# Biodiversity and phylogeny of Cocculinidae (Gastropoda: Cocculinida) in the Indo-West Pacific

HSIN LEE<sup>1,2</sup>, NICOLAS PUILLANDRE<sup>1</sup>, YASUNORI KANO<sup>3</sup>, WEI-JEN CHEN<sup>2,\*</sup> and SARAH SAMADI<sup>1,\*</sup>

<sup>1</sup>*Institut de Systématique, Évolution, Biodiversité (ISYEB), Muséum National d'Histoire Naturelle, CNRS, Sorbonne Université, EPHE, Université des Antilles, CP 51, 57 rue Cuvier, 75005 Paris, France*

<sup>2</sup>*Institute of Oceanography, National Taiwan University, No. 1, Sec. 4, Roosevelt Road, Taipei 10617, Taiwan*

<sup>3</sup>*Atmosphere and Ocean Research Institute, The University of Tokyo, 5-1-5, Kashiwanoha, Kashiwa-shi, Chiba 277-8564, Japan*

Received 22 October 2021; revised 2 February 2022; accepted for publication 20 February 2022

The family Cocculinidae (Gastropoda: Cocculinida) consists of small, usually colourless benthic limpets living primarily at depths below 100 m, and on decaying plant or animal remains. These habitats are difficult to sample and the knowledge about Cocculinidae species diversity, biogeography, ecology and evolution is therefore poor. To explore the species diversity of the Cocculinidae, we examined 499 specimens collected from 196 sites, mainly explored during expeditions of the ‘Tropical Deep-Sea Benthos’ programme in the Indo-West Pacific (IWP). To propose a species hypotheses, we used an integrated approach to taxonomy in which we combined DNA-based methods, with morphological, geographical and ecological considerations. To classify the species hypotheses into genera, we used a combination of one mitochondrial and two nuclear gene fragments to reconstruct a phylogenetic tree. We then used six morphological characters to diagnose the identified genera. Our results revealed an exceptionally high diversity of IWP Cocculinidae, with 51 species hypotheses that were mostly not assigned to available species names. We also discovered a previously unknown type of copulatory structure in the group. At a higher taxonomic level, we identified ten main clades in the family. Although six of them matched existing genera, four others should be regarded as new genera awaiting formal description.

**ADDITIONAL KEYWORDS:** classification – deep sea – organic fall – species delimitation – sunken wood – wooden-steps hypothesis.

## INTRODUCTION

The diversity of the metazoans inhabiting deep-sea habitats remains poorly known with biases towards larger organisms (Costello *et al.*, 2010; Lee *et al.*, 2019; Danovaro *et al.*, 2020) and some spectacular habitats (notably hydrothermal vents). The organic remains decaying on the deep-sea floor are one of the more poorly-studied deep-sea habitats where small and discreet organisms are living (Saeedi *et al.*, 2019; Harbour *et al.*, 2021; Souza *et al.*, 2021). Sunken pieces of wood are carried along rivers to the ocean, drifting with ocean currents and then sinking to the ocean floor. Seagrass leaves, algal holdfasts, bones of marine

vertebrates and hardened parts of invertebrates also remain for an extended period of time as sunken organic material (Cunha *et al.*, 2013; Amon *et al.*, 2017; Plum *et al.*, 2017; Soltwedel *et al.*, 2018). They are commonly colonized by invertebrate communities (Samadi *et al.*, 2010; Kano *et al.*, 2016: table 1). In terms of diversity, molluscs (gastropods, bivalves and chitons) constitute the main component of these communities (Turner, 1977; Wolff, 1979; Kiel & Goedert, 2006; Warén, 2011). Among the wood-associated molluscs, some groups have relatives in hydrothermal vents and cold seeps, which are habitats that have been the focus of much of the deep-sea research in the past few decades. Thanks to these relatives, often having large body sizes, they have been more frequently studied. For instance, Distel *et al.* (2000) suggested that the giant bathymodioline

\*Corresponding author. E-mail: sarah.samadi@mnhn.fr

mussels living in vents and seeps have originated from tiny ancestors that were living on sunken wood and other organic falls (the ‘wooden-steps’ hypothesis). This and many subsequent studies (e.g. Samadi *et al.*, 2007; Lorion *et al.*, 2009, 2010, 2013; Fujiwara *et al.*, 2010; Thubaut *et al.*, 2013; Souza *et al.*, 2021; Zhang *et al.*, 2021) suggested that exploratory efforts still mostly focus on vents and seeps and that this bias had hindered the understanding of evolutionary history of deep-sea mussels.

Among the numerous and small cryptic taxa inhabiting the deep sea, Cocculinidae Dall, 1882 (Gastropoda: Cocculinida) encompass limpet-shaped gastropods that live attached to primarily organic substrates laying on the ocean floor such as sunken wood, cephalopod beaks, and fish and whale bones. They are grazers with a rhipidoglossan radula feeding most probably on co-habiting micro-organisms that decompose these organic remains (Marshall, [1985] 1986; Lesicki, 1998). Their unique habitat, small size and simple shell shape make Cocculinidae one of the most taxonomically puzzling groups of gastropods. Presently, the ‘World Register of Marine Species’ lists 52 valid species classified under seven recognized genera (Moskalev, 1976; Marshall, [1985] 1986; Haszprunar, 1987; McLean, 1987; McLean & Harasewych, 1995; Warén, 1996; Hasegawa, 1997; Leal & Harasewych, 1999; Ardila & Harasewych, 2005; Zhang & Zhang, 2018; Chen & Linse, 2020).

Although relatively stable for the past 35 years, the taxonomy of the family Cocculinidae, named by Dall in 1882, has undergone significant changes as the exploration of deep-sea habitats has progressed. For example, the monotypic genus *Fedikovella* Moskalev, 1976 was described to classify the newly discovered species *Fedikovella caymanensis* Moskalev, 1976 sampled from hadal depths of Cayman Trench in the Caribbean Sea. In the meantime, he proposed five other new genera to revise the classification of the family. Similarly, the monotypic genus *Macleaniella* Leal & Harasewych, 1999 was described to classify a new species collected from 8595 m at the bottom of the Puerto Rico Trench, the deepest point in the Atlantic Ocean. This new species, named *Macleaniella moskalevi* Leal & Harasewych, 1999, differentiated from other cocculinids in having a unique inner septum in its shell. New data and samples also allowed the revision of the family as well as the superfamily Cocculinoidea (Thiele, 1909). For example, the previously recognized cocculinoid genera *Addisonia* Dall, 1882, *Cocculinella* Thiele, 1909, *Lepetella* Verrill, 1880 and *Pseudococculina* Schepman, 1908 are now placed in another superfamily, Lepetelloidea (Bouchet *et al.*, 2017).

Despite the establishment of the classification, the monophyly of the defined genera and the phylogenetic hypotheses were not thoroughly tested, especially not

with molecular tools. Strong *et al.* (2003) conducted the first and only phylogenetic study of the Cocculinidae. They examined 31 morphological characters for 15 cocculinoid species, resulting in a single most parsimonious tree. The monophyly of the superfamily Cocculinoidea (Cocculinidae + Bathysciadiidae), family Cocculinidae and the genera *Cocculina* Dall, 1882 and *Coccoligya* B.A. Marshall, 1986, were all supported. In contrast, *Paracocculina* Haszprunar, 1987 and *Cococrater* Haszprunar, 1987 were recovered as paraphyletic. *Fedikovella* and *Teuthirostria* Moskalev, 1976 collectively formed a monophyletic group sister to all other cocculinids.

Members of Cocculinidae have been recorded from all oceans of the world. Their lecithotrophic larvae (Young *et al.*, 2013) suggests limited dispersal ability and many geographically restricted species have been defined. In the Indo-West Pacific (IWP), the area of the present study, 30 species in four genera are currently recognized. *Cocculina*, the most studied genus of the family, contains 20 IWP species (e.g. Watson, 1886; Schepman, 1908; Thiele, 1925; Kuroda & Habe, 1949; Hasegawa, 1997; Zhang & Zhang, 2018). *Coccoligya* includes seven IWP species with five possible endemics in the waters around New Zealand (Marshall, [1985] 1986) and two others distributed in the north-western Pacific including the seas around Japan, Korea and Taiwan (Kuroda & Habe, 1949; Hasegawa, 1997). *Cococrater* contains the type species *Cococrater radiatus* (Thiele in E. von Martens, 1904) from off Sumatra as the only IWP member of the genus. *Paracocculina* is composed only of two IWP species, namely *Paracocculina cervae* (C.A. Fleming, 1948) from off New Zealand and *Paracocculina laevis* (Thiele in E. von Martens, 1904) from off Sumatra, Indonesia.

In this study, we aim at exploring the species diversity and phylogeny of the Cocculinidae by broadly sampling the upper bathyal habitats in the tropical IWP. As it is clear that the systematic investigations cannot rely solely, or even primarily, on morphological examination (e.g. Puillandre *et al.*, 2017; Razkin *et al.*, 2017; Nantararat *et al.*, 2019; Horsáková *et al.*, 2020), we here use an integrated approach by combining evidence from morphology, geography, ecology and DNA-based species delimitation. We then assigned the inferred IWP species into monophyletic groups or genera based on the molecular phylogenetic reconstruction of the Cocculinidae. We also examine how useful the six morphological characters are in the redefinition of the existing genera and the definition of new genus-level clades.

## MATERIAL AND METHODS

### SAMPLE COLLECTION AND SELECTION

The specimens examined were mostly collected during 21 IWP expeditions of the ‘Tropical Deep-Sea

Benthos' (TDSB) programme led by the Muséum national d'Histoire naturelle (MNHN) and the Institut de Recherche pour le Développement (IRD), in collaboration with the National Taiwan University (NTU) and the National Taiwan Ocean University (NTOU), between 2004 and 2018: AURORA 2007, BIOPAPUA, BOA1, CONCALIS, DONGSHA 2014, EBISCO, EXBODI, KAVALAN 2018, KAVIENG 2014, MADEEP, MAINBAZA, MIRIKY, NANHAI 2014, NORFOLK 2, PANGLAO 2004, PANGLAO 2005, PAPUA NIUGINI, SALOMON 2, SALOMONBOA 3, SANTO 2006 and TAIWAN 2013. During the listed expeditions (for more details see <https://expeditions.mnhn.fr>) specific efforts were made by the on-board scientific teams to collect fauna associated with plant remains [reviewed notably in Samadi *et al.* (2010) and Pante *et al.* (2012)]. The sampling covered the areas surrounding Taiwan (including the South China Sea and East China Sea), the Philippines (Bohol and Sulu seas and the Pacific coast), Papua New Guinea (Bismarck Sea and Solomon Sea), Solomon Islands (Solomon Sea), New Caledonia (Coral Sea), Vanuatu (Coral Sea) and Madagascar (in the Mozambique

channel) (Fig. 1). Most specimens were found attached to organic substrates collected by dredging or trawling at depths ranging from 100 to 1500 m. Some specimens were collected from organic substrates that were deployed on the deep-sea floor as traps to attract the recruitment of larvae [Samadi *et al.* (2010) for more details]. Additional specimens were collected from areas surrounding Japan and from the East China Sea (Fig. 1; Supporting Information, Table S1). We also included several Caribbean specimens from the expedition KARUBENTHOS 2 from the TDSB programme available in the collection of the MNHN to increase sample diversity and to assign generic names to clades; the type species of *Cocculina* and *Macleaniella* were described from this area.

From the samples collected at 250 sampling stations during these 21 IWP expeditions of the TDSB programme, we gathered thousands of 'cocculiniform' limpets. Cocculiniforms refer to both of the phylogenetically distant cocculinoids and lepetelloids (Ponder & Lindberg, 1997; Bouchet *et al.*, 2017; Lee *et al.*, 2019), which are barely differentiable by examining the shape and ornamentation of the

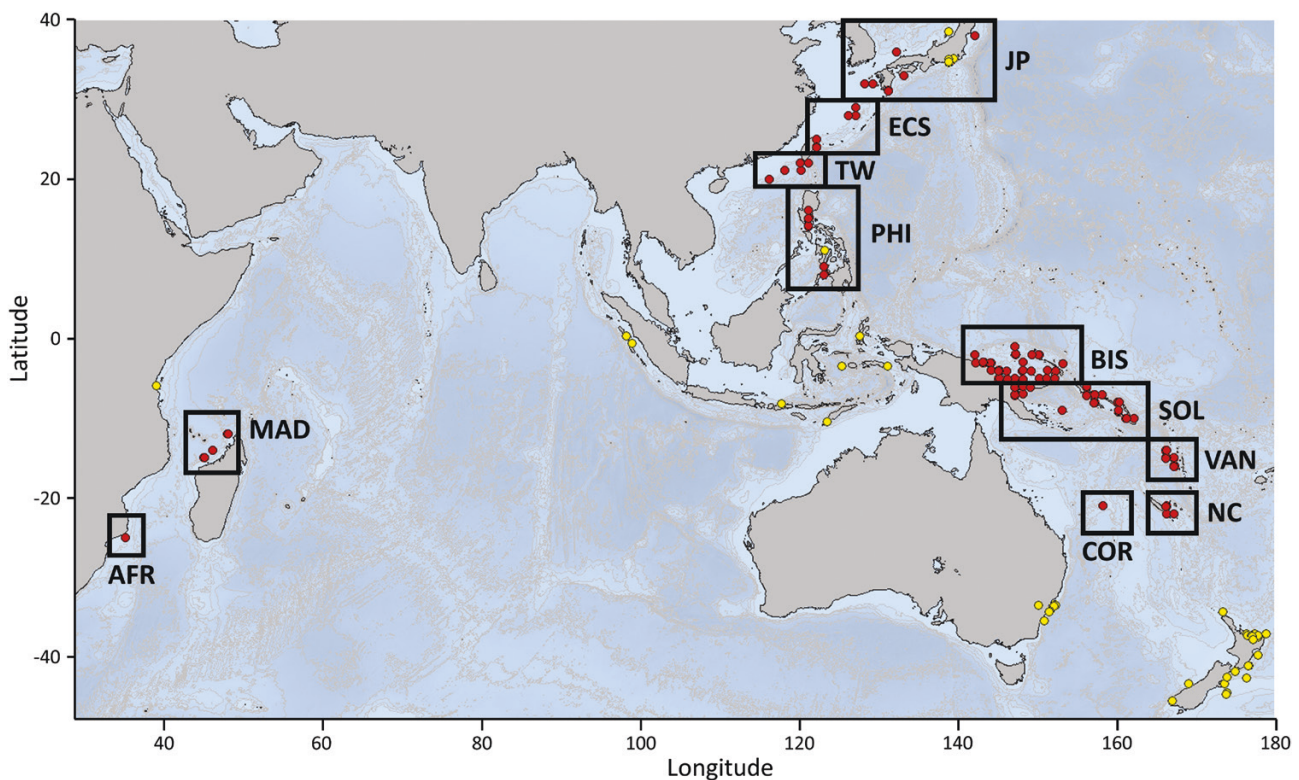

**Figure 1.** Localities of cocculinid specimens collected during our expeditions (red) and those in literature records (yellow; Watson, 1886; Schepman, 1908; Thiele, 1925; Marshall, 1985; Hasegawa, 1997; Lesicki, 1998; Zhang & Zhang, 2018) in the Indo-West Pacific. Squares indicate the 11 regions identified. AFR: Mozambique Channel; MAD: Madagascar; TW: Taiwan plus South China Sea; ECS: East China Sea; PHI: seas surrounding the Philippines; JP: seas surrounding Japan; BIS: Bismarck Sea; SOL: Solomon Sea; COR: Coral Sea; VAN: seas surrounding Vanuatu; NC: seas surrounding New Caledonia.

teleoconch (post-metamorphic shell) alone. Scientific teams on board the research vessels therefore sorted all cocculiniform limpets and preserved them in 95% ethanol. The number of specimens per sampling station was uneven, and these specimens often contained multiple morphotypes with different relative abundances. To best cover species diversity, we first sorted the specimens from each station into morphotypes and then selected one to three specimens from each morph (Fig. 2). This resulted in our selection of 709 cocculiniform specimens for genetic and morphological analyses.

#### DNA SEQUENCING

We extracted total genomic DNA from the muscle tissue of 709 specimens using either the LabTurbo 48 Compact System automated extractor and LGD 480-220 kit (Taigene BioSciences Corp., Taiwan) or the NucleoSpin 96 Tissue kit (Macherey-Nagel, France) with the epMotion 5075 automated pipetting system according to the manufacturers' instructions.

We amplified, for either all or a subset (see below) of these specimens, a barcode fragment of the mitochondrial cytochrome c oxidase subunit 1 (*cox1*), a fragment of the nuclear Histone H3 (*H3*) gene and the C1–D2 region of the 28S ribosomal RNA gene (28S). We amplified the *cox1* fragment for all specimens mainly using Folmer *et al.*'s (1994) primers: LCO-1490 (5'-GGT CAA CAA ATC ATA AAG ATA TTG G-3') and HCO-2198 (5'-TAA ACT TCA GGG TGA CCA AAA AAT CA-3'). However, these universal primers did not always work and an alternative primer set was designed for amplification and sequencing: CoccCOI-43F (5'-GGA ACA CTY TAT ATT YTA TTA GG-3') and CoccCOI-631R (5'-GTN GTA TTR AAA TTT CGA TC-3'). For a subset of the specimens, we also amplified a fragment of the 28S gene using the C1 (5'-ACC CGC TGA ATT TAA GCA T-3') and D2 (5'-TCC GTG TTT CAA GAC GGG-3') primer set (Chisholm *et al.*, 2001) and a fragment of the *H3* gene using the primers H3F1 (5'-ATG GCT CGT ACC AAG CAG ACV GC-3') and H3R1 (5'-ATA TCC TTR GGC ATR ATR GTG AC-3') (Colgan *et al.*, 1998).

We performed the PCR reactions in 20 µL, using 1–3 µL DNA, 1 × reaction buffer, 1.25 mM MgCl<sub>2</sub>, 0.26 mM dNTP, 0.3 µM of each primer and 1.5 U Q-Bio Taq (MP Biomedicals, LLC., USA). We started the PCR with a cycle of 94 °C for 5 min, followed by 35 cycles of denaturation step (94 °C 30 s), annealing step (51 °C for *cox1*, 56 °C for 28S and 53 °C for *H3*, 30 s) and elongation step (72 °C 45 s for *cox1*, 1 min for 28S and 30 s for *H3*) and a final elongation step for 5 min (72 °C). The purification and sequencing for PCR products were mainly carried out by Eurofins Scientific

(France). For others the purification was conducted with the AMPure magnetic bead clean-up protocol (Agencourt Bioscience Corp., USA) and the sequencing was performed at the Center of Biotechnology, National Taiwan University.

The obtained DNA sequence chromatograms were visualized, edited and assembled using CodonCode Aligner v.6.0.2 (Codoncode Corporation, Dedham, MA, USA). The edited sequences were manually aligned and compiled using the software SE-AL v.2.0 (Rambaut, 1996). However, some *H3* sequences ( $N = 39$ ) presented more than one peak at multiple nucleotide positions in the sequences. We thus suspected a presence of paralogs or contaminant sequences. To resolve this, we pooled the PCR products of those 39 problematic *H3* samples to construct a library using the NEBNext library preparation kit (New England Biolabs, MA, USA) with a single *H3* PCR per tag (Hinsinger *et al.*, 2015) for next generation sequencing (NGS) under the Ion Torrent system (Life Technologies, France). Template amplifications of the library were performed by emulsion PCR on an Ion OneTouch robotic system, and the subsequent sequencing was performed on an Ion Torrent PGM sequencer using Hi-Q chemistry (Life Technologies). The sequences were demultiplexed a posteriori (Hinsinger *et al.*, 2015) and assembled using Geneious R9 (Biomatters Ltd., Auckland, New Zealand). To rule out the possibility of contamination, we compared the obtained sequences using a BLAST search as implemented in NCBI GenBank and topologies of phylogenetic trees inferred from individual gene fragments.

#### PRIMARY SPECIES HYPOTHESES (PSHS)

Following Castelin *et al.* (2012) and Puillandre *et al.* (2012b), we defined an integrative workflow for species delimitation of the sampled cocculinids (Fig. 2).

We first examined the 589 *cox1* sequences that we successfully obtained from 709 specimens. We compared these sequences to each other by reconstructing preliminary maximum likelihood (ML) trees. The data matrix for the ML reconstruction also included GenBank sequences of seven cocculinoids, 12 vetigastropods including nine lepetelloids and one cephalopod (data not shown). We considered that the new sequences represent true cocculinids when they form a well-supported clade with sequences from GenBank attributed to this family. Conversely, we considered that we should probably attribute those grouping with sequences attributed to other vetigastropods to lepetelloids. We also used the same sequences in a BLAST search to see if there were any cocculinoid sequences in the top five hits (sorted by Max Score). Consequently, we concluded that 498 specimens from 187 of our sampling stations were true

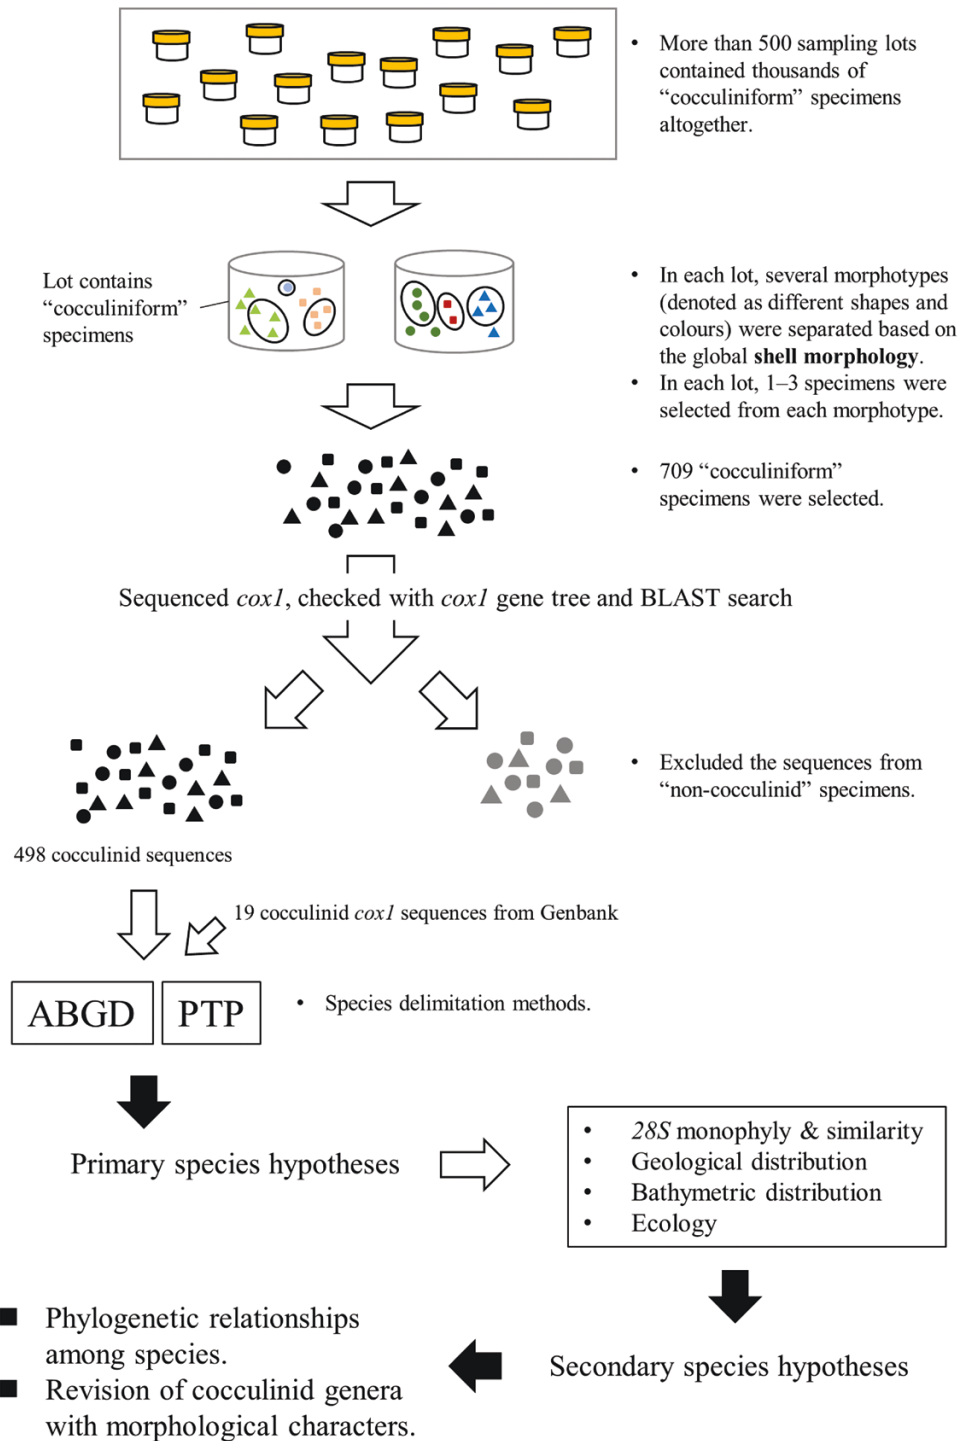

**Figure 2.** Diagram of the integrative approach used for species delimitation. ABGD: Automatic Barcode Gap Discovery; PTP: Poisson Tree Processes.

cocculinids (Supporting Information, Table S1); the collection sites of these specimens are shown in Figure 1.

We analysed 517 *cox1* sequences, including the 498 newly obtained and 19 GenBank sequences,

with two methods of species delimitation: Automatic Barcode Gap Discovery (ABGD) (Puillandre *et al.*, 2012a) and the Bayesian Poisson Tree Processes (bPTP) model (Zhang *et al.*, 2013). We collected from

GenBank (listed in [Supporting Information, Table S1](#) with available information on the origin of the sequences) sequences attributed to *Cocculina messingi* [McLean & Harasewych, 1995](#) (AY377731, AY923910 and EU530108), *Cocculina enigmadonta* [C.Chen & Linse, 2020](#) (MN539277–MN539281), *Coccopigya punctoradiata* ([Kuroda & Habe, 1949](#)) (AB365259 and AB238590), *Cocculina subcompressa* [Schepman, 1908](#) (GQ160744), *Coccopigya hispida* B.A. Marshall, 1986 (AY296823 from the voucher NMNZ M075188, which is a paratype of the species) and seven sequences unidentified at the species level: Cocculinidae sp. (HG942540), *Cocculina* spp. (AB238591, AB238592, GQ160743 and GQ160745) and *Coccopigya* spp. (FM212785 and FM212786). ABGD, an exploratory tool based on pairwise genetic distances, detects if there is a significant gap between inter- and intraspecific variation (the so-called barcode gap). We used the online version of ABGD (<https://bioinfo.mnhn.fr/abi/public/abgd/>) with K2P distance ([Kimura, 1980](#)) and other default parameters. We also delineated the cocculinids into species with bPTP on the bPTP webserver (<http://species.h-its.org/ptp/>) with 500 000 Markov chain Monte Carlo (MCMC) generations and the default parameters. We used bPTP, rather than the Generalized Mixed Yule Coalescent method ([Pons et al., 2006](#)), by following [Tang et al. \(2014\)](#) who suggested its robustness with a user-specified tree (here a rooted ML tree inferred from a *cox1* dataset with all cocculinid haplotypes and two bathysciadiid sequences as outgroup taxa). We then proposed PSHs for clades delimited by both ABGD and bPTP. Finally, we evaluated different lines of evidence to define secondary species hypotheses ([Fig. 2](#)).

#### SECONDARY SPECIES HYPOTHESES (SSHs)

To decide if we turn the detected PSHs into secondary species hypotheses (SSHs) we used additional criteria as described in [Figure 2](#). The main additional sources of evidence were firstly the nuclear genetic data that are unlinked to the mitochondrial data used to establish the PSH, and then the comparisons of the geographic range and the ecological data (depth and habitat) with the sister PSH.

The recovery of a given PSH as a clade in both mitochondrial- and nuclear-gene trees strongly supports the distinctiveness of the species ([Pante et al., 2015](#)). Consequently, we reconstructed phylogenetic trees using 28S sequences (for more details notably on alignment methods see ‘Phylogenetic inference within the Cocculinidae’). We tried to sequence a fragment of the 28S gene for up to five representatives of each PSH defined with the *cox1* gene and for another specimen from the Caribbean Sea for which we failed to obtain a *cox1* sequence (MNHN-IM-2013-60187; [Supporting](#)

[Information, Table S1](#)). The first 415 base pairs of the 28S fragment were too conserved at the species level, but useful at a deeper phylogenetic scale. Consequently, we reconstructed a tree based only on this conserved part (hereafter referred to as the 28S-gene ‘master’ tree) to define main lineages. We then reconstructed a subtree for each main lineage by aligning the entire length of the 28S fragment, which were partly too variable to be aligned with other lineages (hereafter referred to as the 28S-gene ‘sub’ trees). We regarded a PSH as a potential SSH when its component individuals constituted a supported phylogenetic clade in the 28S subtree or if they shared an identical 28S sequence.

The paucispiral protoconch of cocculinids indicates a lecithotrophic larval development and thus a limited dispersal capability ([Young et al., 2013](#)). Closely related PSHs separated by a geographic barrier, such as a landmass, an oceanic threshold or current, might have diverged under an allopatric process of genetic differentiation, and we thus combined them into the same SSH. On the contrary, the presence of sister PSHs in the same geographic region suggests the presence of an effective reproductive isolation mechanism. In this case, we maintained the sister PSHs as separate SSHs. We here defined 11 geographic regions based on the distributions of landmasses, boundaries of sea basins and major ocean currents: seas surrounding Japan (JP), East China Sea (ECS), seas surrounding Taiwan plus the South China Sea (TW), seas surrounding the Philippines (PHI), Bismarck Sea (BIS), Solomon Sea (SOL), seas surrounding Vanuatu (VAN), seas surrounding New Caledonia (NC), the Coral Sea (COR), seas off north Madagascar (MAD) and the Mozambique Channel (AFR) ([Fig. 1](#)).

Depth is a major element of the ecological niche of benthic species (e.g. [Stuart et al., 2017](#)). In a given geographic area, two closely related PSHs displaying distinct depth ranges have probably distinct ecological niches and were therefore considered as separate SSHs. However, the exact depth of the occurrence of the sampled specimens is difficult to determine because a trawling or dredging operation starts and ends at different depths. To estimate the bathymetric range of each proposed PSH, we followed the method used by [Bouchet et al. \(2008:15\)](#), taking the inner values of the deepest and shallowest stations. For those PSHs that contained only single specimen, we kept the original operating depth range of the station.

In taxonomic literature, cocculinid species are often described as specifically associated with a given type of organic substrate (e.g. [Zhang & Zhang, 2018](#)). The field data allowed us to determine on which organic substrates the specimens were collected and thus to highlight a potential association of a PSH to a specific substrate. We considered that sister PSHs associated

with distinct substrates may be considered as different SSHs.

#### BETA DIVERSITY ANALYSIS

To estimate the dissimilarity of cocculinid species diversity among stations from the 11 geographic regions defined above, we used non-metric multidimensional scaling (NMDS) plots based on the Jaccard similarity coefficient with a presence/absence data matrix, implemented in the R package ‘vegan’ (Oksanen *et al.*, 2019).

#### PHYLOGENETIC INFERENCE WITHIN THE COCCULINIDAE

To examine the relationships among the delimited species (SSHs) and to revise the genus-level classification of the Cocculinidae, we inferred phylogenetic trees based on three genes. To complement the *cox1* and 28S datasets we employed a *H3* dataset obtained using both the Sanger and NGS techniques. This *H3* dataset contained representatives from each SSH, including sequences extracted from GenBank (Supporting Information, Table S1). We aligned the *cox1* and *H3* sequences by eye and the 28S using the automatic multiple alignment tool implemented in MAFFT v.7 with default parameters (Katoh & Standley, 2013).

We compiled a combined dataset with the *cox1*, 28S and *H3* sequences for a common set of 140 taxa, including two distant outgroups of Neomphalida (*Melanodrymia aurantiaca* Hickman, 1984 and *Peltospira smaragdina* Warén & Bouchet, 2001) and the two bathysciadiids used for species delimitation. The dataset included at least one representative of each SSH (Supporting Information, Table S1).

We reconstructed phylogenetic trees with the partitioned ML method using the *cox1* dataset, the reduced *cox1* dataset for bPTP, the 28S master dataset, the 28S subdatasets, the *H3* dataset and the combined dataset implemented in RAxML v.8.0 (Stamatakis, 2014). The GTR+G substitution model was employed for the analyses because RAxML only provides GTR-related models of rate heterogeneity. Partitions were set by genes and for *cox1* and *H3* by codon positions. Nodal support was assessed by bootstrapping (Felsenstein, 1985) with 1000 pseudoreplicates.

For the combined dataset, we also performed a Bayesian inference (BI) using MrBayes v.3.2.6 (Ronquist *et al.*, 2012) on the CIPRES Science Gateway (Miller *et al.*, 2010), with eight Markov chains in two parallel runs for 30 000 000 generations, a sampling frequency of one tree per thousand generations and a heating temperature of 0.02. The convergence of the likelihood scores for parameters was further evaluated using Tracer v.1.6 (Rambaut *et al.*, 2014) to make sure

that all ESS values were over 200. To be consistent with the ML analysis, we used the same partitions and the same GTR+G substitution model for the BI method.

#### MORPHOLOGICAL CHARACTERIZATION

We used four morphological characters to complete the morphological diagnosis of the SSHs and to guide the required final revision of the cocculinids. Shell shape, teleoconch structure, position of the copulatory organ and presence or absence of epipodial tentacles are characters commonly used in the literature to describe cocculinid species. We thus divided the examined specimens into morphogroups by identifying the character states as follows (Supporting Information, Table S2).

##### *Shell shape*

We classified the shapes of the examined cocculinid shells into round (oval to conical) or spindle shaped.

##### *Teleoconch sculpture*

Most cocculinid species have a patelliform teleoconch with simple radial ribs and fine concentric growth lines (Fig. 3A), radial ribs with pits and periostracal spines (Fig. 3B), plainly raised radial ribs (Fig. 3C), a clathrate sculpture with concentric lines more prominent than axial ribs (Fig. 3D) or a strong concentric sculpture (Fig. 3E). Other cocculinids have a smooth teleoconch with indistinct growth lines only (Fig. 3F).

##### *Copulatory organ*

The copulatory organ of cocculinids is highly variable and has been considered a useful character for generic diagnoses (Haszprunar, 1987). We observed four types of copulatory organs at different positions. These were associated with, or branched from, the right cephalic tentacle (Fig. 4A), the anterior right corner of the foot (Fig. 4B), the right neck under the oral lappet (Fig. 4C) or the right mantle margin (Fig. 4D).

##### *Epipodial tentacle*

All cocculinids except *Coccopigya* species have a pair of epipodial tentacles on the posterior foot (Marshall, [1985] 1986; Strong *et al.*, 2003).

We then assigned these groups to the existing genera according to the taxonomic literature wherever possible (Marshall, [1985] 1986; Haszprunar, 1987; McLean, 1987; McLean & Harasewych, 1995; Leal & Harasewych, 1999).

To complement the description of the new genera identified by our molecular analysis, we also coded

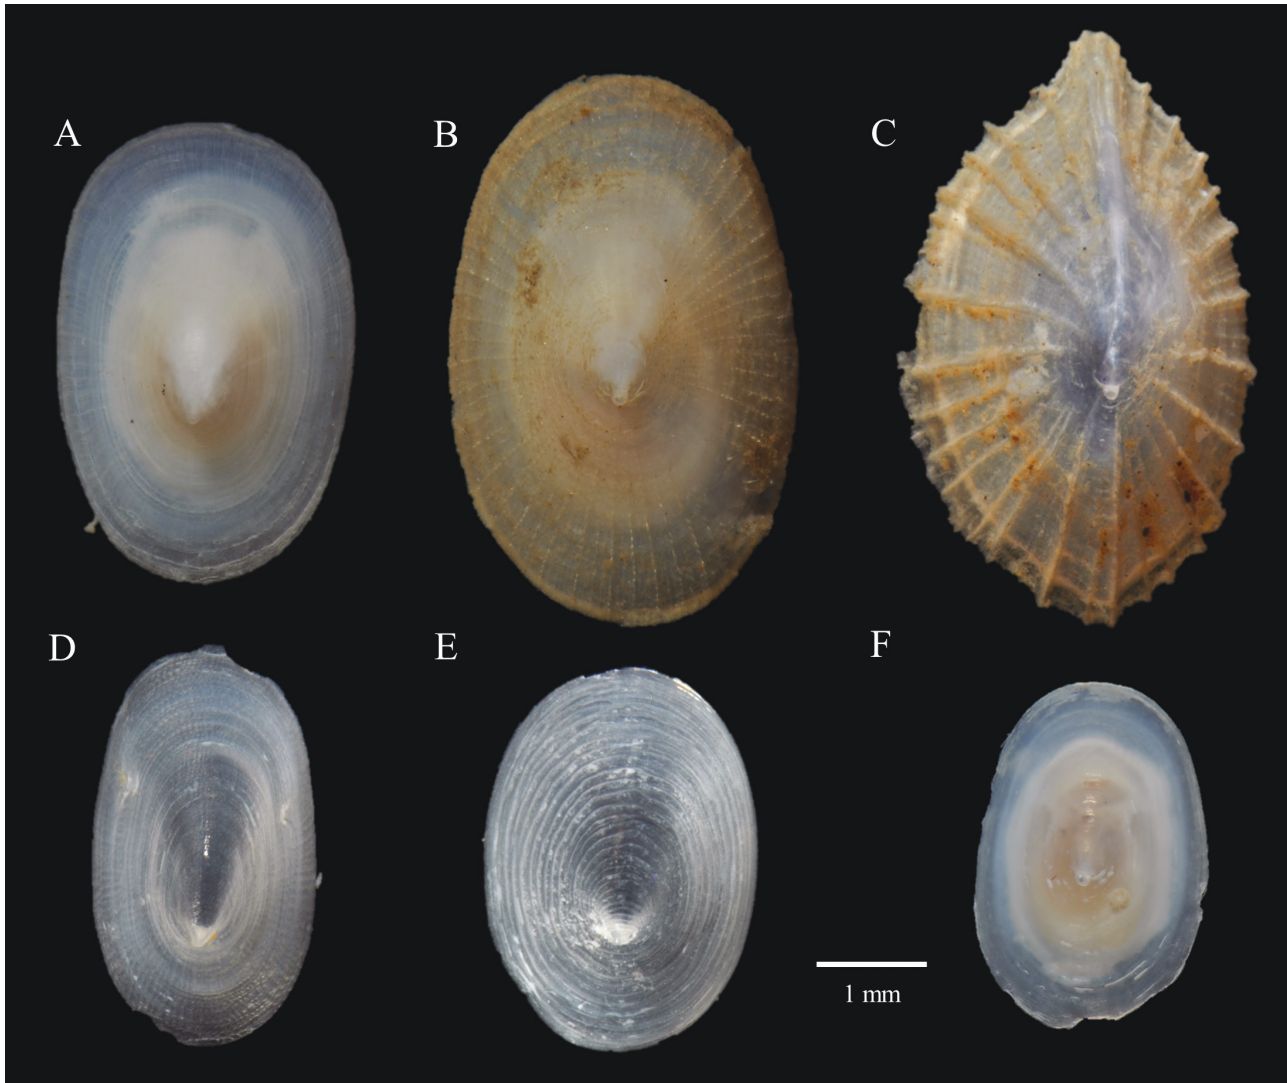

**Figure 3.** Characters used in morphological examination. Teleoconch structure: A, radially ribbed (MNHN-IM-2013-42733, MC10), B, radially ribbed with pits and hairs (MNHN-IM-2013-42896, MG5), C, plainly raised radially ribbed (MNHN-IM-2013-62346, MB7), D, clathrate (MNHN-IM-2013-62341, MD5), E, concentric (MNHN-IM-2009-11985, MH1) or F, smooth (MNHN-IM-2013-42654, ME1).

the variability of the protoconch and the radula. These characters can only be observed under scanning electron microscopy (SEM). For the preparation of the radula, we pulled out the entire radular ribbon by hand dissection and treated it with diluted bleach until surrounding tissue was completely dissolved. After rinsing several times with distilled water, the radula was unfolded and then mounted on a stub. We conducted the SEM observation mainly at MNHN and some at the Atmosphere and Ocean Research Institute (AORI), the University of Tokyo.

#### Protoconch

A reticulate sculpture is dominant in the protoconchs of the Cocculinidae (Fig. 5A). However, in some

cocculinids the protoconch shows concentric lines in the first half and smooth in the last half (Fig. 5B).

#### Radula

The rachidian tooth of the cocculinoid radula is characterized by overhanging cusps, which may be present or obsolete (Strong *et al.*, 2003). Then, we distinguished the radula based on two features: the shape of the rachidian and the number of cusps on the rachidian. We defined six distinct types of cocculinid rachidian tooth: (a) ‘obsolete’, no rachidian observed (Fig. 5C); (b) ‘acusate-flat’, tip flat without a cusp (Fig. 5D); (c) ‘unicuspid narrow’, tip narrow with a pointed cusp (Fig. 5E); (d) ‘unicuspid broad’, tip broad



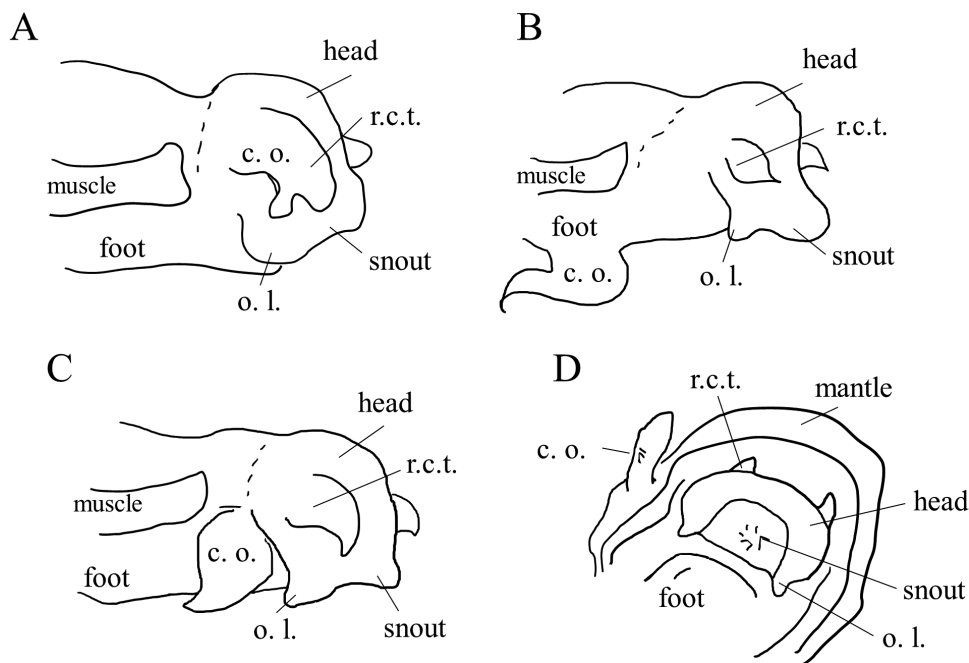

**Figure 4.** Characters used in morphological examination. Copulatory organ: A, associated with or branched from right cephalic tentacle, B, originated from foot, C, originated from oral lappet or D, originated from mantle margin. c.o.: copulatory organ, r.c.t.: right cephalic tentacle, o.l.: oral lappet.

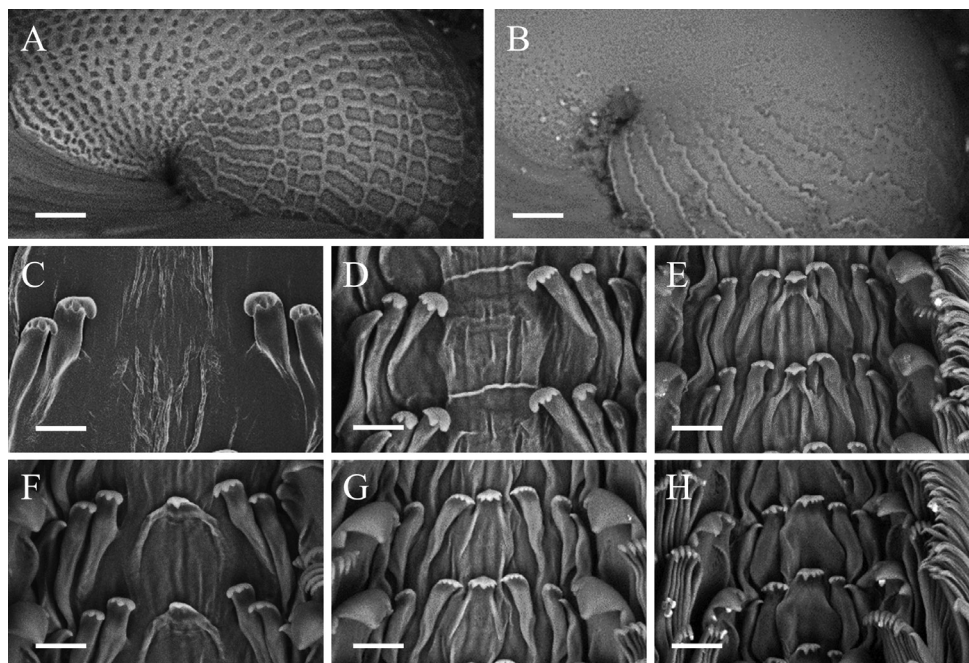

**Figure 5.** Characters used in morphological examination. Protoconch: A, reticulate (MNHN-IM-2013-42752, MC2) or B, concentric (MNHN-IM-2013-62343, MD8). Radula: C, 'obsolete' (*C. japonica*), D, 'acuspate-flat' (MNHN-IM-2013-42608, MC9), E, 'unicuspid narrow' (MNHN-IM-2013-42715, MB1), F, 'unicuspid broad' (MNHN-IM-2013-42803, MC14), G, 'multicuspid narrow' (MNHN-IM-2013-42570, MD3) or H, 'multicuspid broad' (MNHN-IM-2013-62344, MA5).

and pointed (Fig. 5F); (e) ‘multicuspid narrow’, tip narrow with more than one cusp (Fig. 5G); and (f) ‘multicuspid broad’, tip broad with more than one cusp (Fig. 5H).

## RESULTS

### DATASETS FOR SPECIES DELIMITATION

The final alignment of the *cox1* dataset contained 657-bp long sequences from 498 sampled cocculinids and 19 GenBank entries, plus two bathysciadiids for rooting. The inferred phylogenetic tree is presented in Supporting Information (Fig. S1). The terminal taxon labels are composed of two letters, corresponding to eight morphogroups as defined with the four primary morphological characters (shell shape, teleoconch sculpture, conditions of copulatory and epipodial tentacles; Table 1; Supporting Information, Table S3), followed by a number, corresponding to PSH (see below), namely MA1–MA12, MB1–MB10, MC1–MC19, MD1–MD8, ME1–ME3, MF1–MF9, MG1–MG18 and MH1–MH2.

We aligned 415 bp of the sequences from the 147 samples successfully sequenced (including one outgroup) in the 28S ‘master’ dataset. The inferred ML tree allowed us to reveal seven genetically distinct clades or groups (Supporting Information, Fig. S2). Based on this phylogenetic result, we compiled seven subdatasets, including 28S-a (404 bp, 14 samples), 28S-b (816 bp, 39 samples), 28S-c (800 bp, 18 samples), 28S-d (408 bp, 13 samples), 28S-e (731 bp, seven samples), 28S-f (791 bp, 20 samples) and 28S-g (811 bp, 35 samples). We then added an additional sample as outgroup taxon to each subdataset. However, 18 sequences in 28S-b were too different and we were not able to correctly align them with others. We thus

removed them (809 bp, 21 samples left) and put them aside in a new dataset, 28S-h (816 bp, 18 taxa). Finally, the inferred tree shows eight groups (Supporting Information, Fig. S2). Phylogenetic trees inferred from the 28S subdatasets are shown in the Supporting Information (Fig. S3A–H).

### SPECIES DELIMITATION ANALYSES

The ABGD and bPTP analyses delimited 89 and 92 PSHs, respectively, 78 of which were recovered in both analyses. Figure 6 summarizes results from ABGD, bPTP and other criteria used for species delimitation. Also shown in this figure are the numbers of shell morphotypes, which were classified on the basis of global shell morphology, within each morphogroup (MA–MH). We considered PSHs as separate species when they were reciprocally monophyletic in a 28S subtree. Some pairs or triplets of PSHs (MG11–MG13; MD2 and MD3; MA6 and MA7; MA11 and MA12; MC16 and MC17; MF3 and MF4; Fig. 6) shared the same 28S sequence, and we conservatively considered such PSHs as a single species. Similarly, if two allopatric PSHs were gathered in the same 28S clade we considered them as geographic populations of single species (i.e. MG2–MG4; MG6–MG10; MD4 and MD5; MB9 and MB10; Fig. 6A, B). Figure 6 further illustrates how we integrated the different lines of evidence to make our decisions. Note that in all cases, our final decision was conservative, i.e. if there was no clear evidence to choose between one single species or two different species, we decided to choose the single species option. Examples include MC13, MC14 and MC15 that lacked 28S data (Fig. 6C). By taking all lines of evidence into account, we inferred 60 SSHs (including one without *cox1* data but with 28S, morphological and geographic data). Of these, we recorded 51 from the 187 stations sampled

**Table 1.** Eight morphogroups of Cocculinidae and their habitats

|           | Shell shape | Teleoconch sculpture            | Copulatory organ                     | Epipodial tentacles | Habitat                                 |
|-----------|-------------|---------------------------------|--------------------------------------|---------------------|-----------------------------------------|
| <b>MA</b> | Round       | Radial or plainly raised radial | Modified right cephalic tentacle     | Present             | Wood                                    |
| <b>MB</b> | Spindle     | Plainly raised radial           | On oral lappet                       | Present             | Wood                                    |
| <b>MC</b> | Round       | Radial, smooth or concentric    | On oral lappet                       | Present             | Wood                                    |
| <b>MD</b> | Round       | Clathrate                       | Right cephalic tentacle (unmodified) | Present             | Wood                                    |
| <b>ME</b> | Round       | Smooth                          | On mantle margin                     | Present             | Wood                                    |
| <b>MF</b> | Round       | Radial                          | On foot                              | Present             | Wood                                    |
| <b>MG</b> | Round       | Radial with pits                | Modified right cephalic tentacle     | Absent              | Wood, leaf, bone                        |
| <b>MH</b> | Round       | Concentric or smooth            | Modified right cephalic tentacle     | Present             | Chondrichthyan egg case, deep-sea coral |

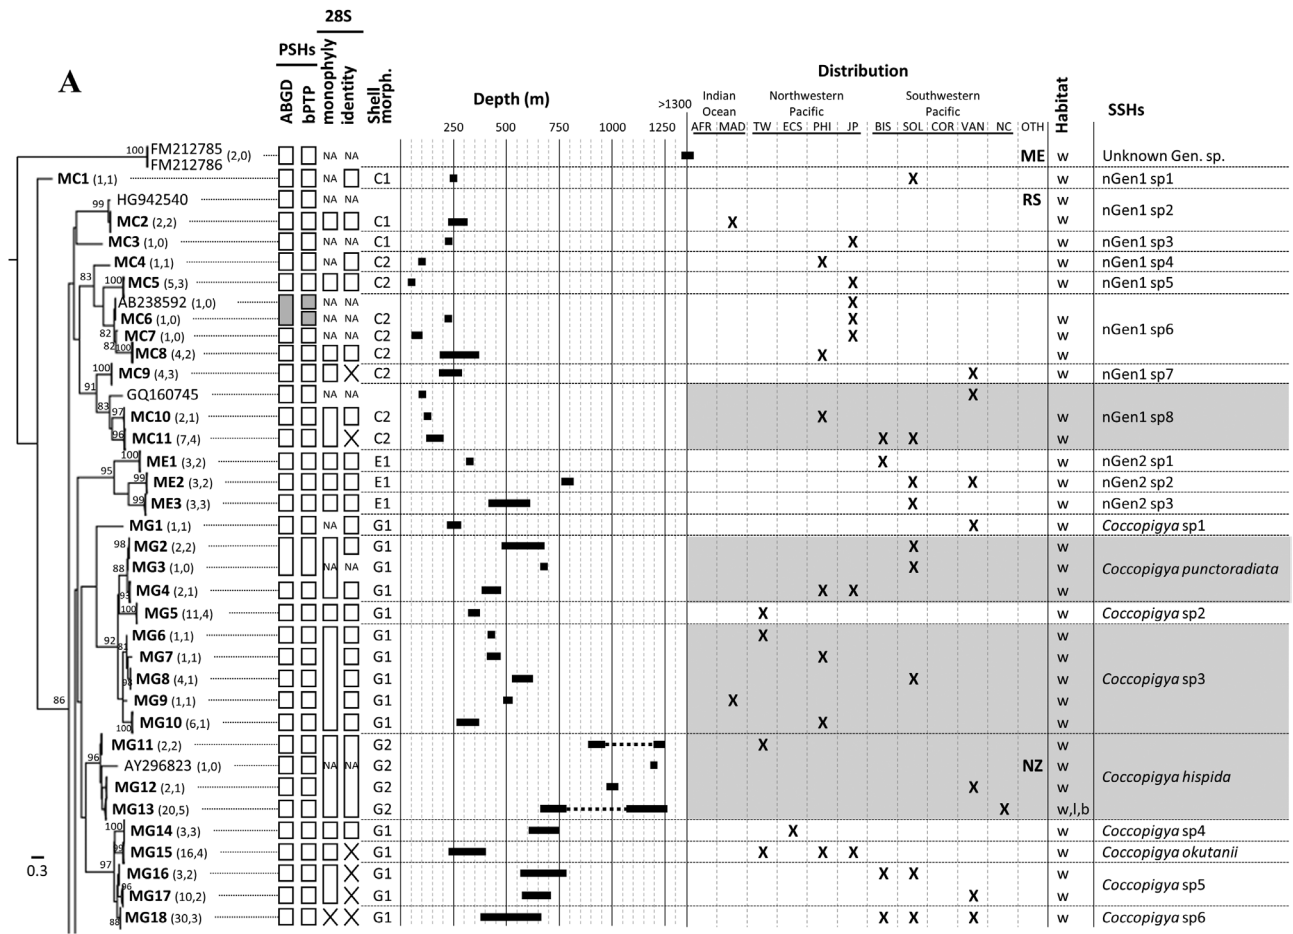

**Figure 6.** Maximum-likelihood tree based on *cox1* dataset of cocculinids with results of species delimitation analyses. A, morphogroups MC, ME and MG. Numbers at tree nodes represent bootstrap values in percentages (values < 70% not shown). Names of primary species hypotheses (PSHs) are followed by number of sequences determined (*cox1* and 28S). Boxes for PSHs are highlighted in grey when differently delimited in ABGD and PTP analyses (numerals in boxes represent numbers of *cox1* sequences; asterisks and plus signs for MA9–MA12 denote the same PSH detected by ABGD and PTP, respectively). 28S sequence monophyly and identity are also shown as empty boxes (NA: no data); cross marks (X) indicate non-monophyly or genotype shared with other PSHs. ‘Shell morph.’ denotes distinguishable forms of the shell with different numerals in each morphogroup (MA–MH). C1 for MC1–MC3, for example, means that the three PSHs are identical in conchological characteristics. Known bathymetric and geographic distributions and habitat are also provided for each PSH (bathymetric distribution—sampled depth ranges shown in lines, dotted lines represent the estimated distributed range; geographic distribution—AFR: Mozambique Channel, MAD: north Madagascar, TW: Taiwan and South China Sea, ECS: East China Sea, PHI: Philippines, JP: Japan, BIS: Bismarck Sea, SOL: Solomon Sea, COR: Coral Sea, VAN: Vanuatu, NC: New Caledonia, OTH: others, ME: Mediterranean, NZ: New Zealand, RS: Red Sea, AT: Atlantic, EP: East Pacific, WS: Weddell Sea; habitat—w: wood, l: leaf, b: bone, c: coral, e: egg case, vent\*: hydrothermal vent area). Secondary species hypotheses (SSHs) are shown with generic and species names if available; those found from more than one area (north-western Pacific, south-western Pacific, and Indian Ocean) are highlighted in grey.

in the IWP. Morphological characters of each SSH are shown in the [Supporting Information \(Table S2\)](#).

REGIONAL SPECIES DIVERSITY

We included the 187 IWP stations in our NMDS analysis. The stress value reached close to 0 (around 0.0007) after 200 NMDS runs, suggesting the presence

of outlier stations. This result was not surprising since some stations contained a single, unique species. For a better recognition of underlying patterns, we removed 25 dissimilar stations that showed NMDS1/NMDS2 over 20 or below -20. The re-analysis with 162 stations resulted in a final stress value of 0.022. NMDS plots showed two main groups. One contained most stations in the south-western Pacific and Indian Ocean, and

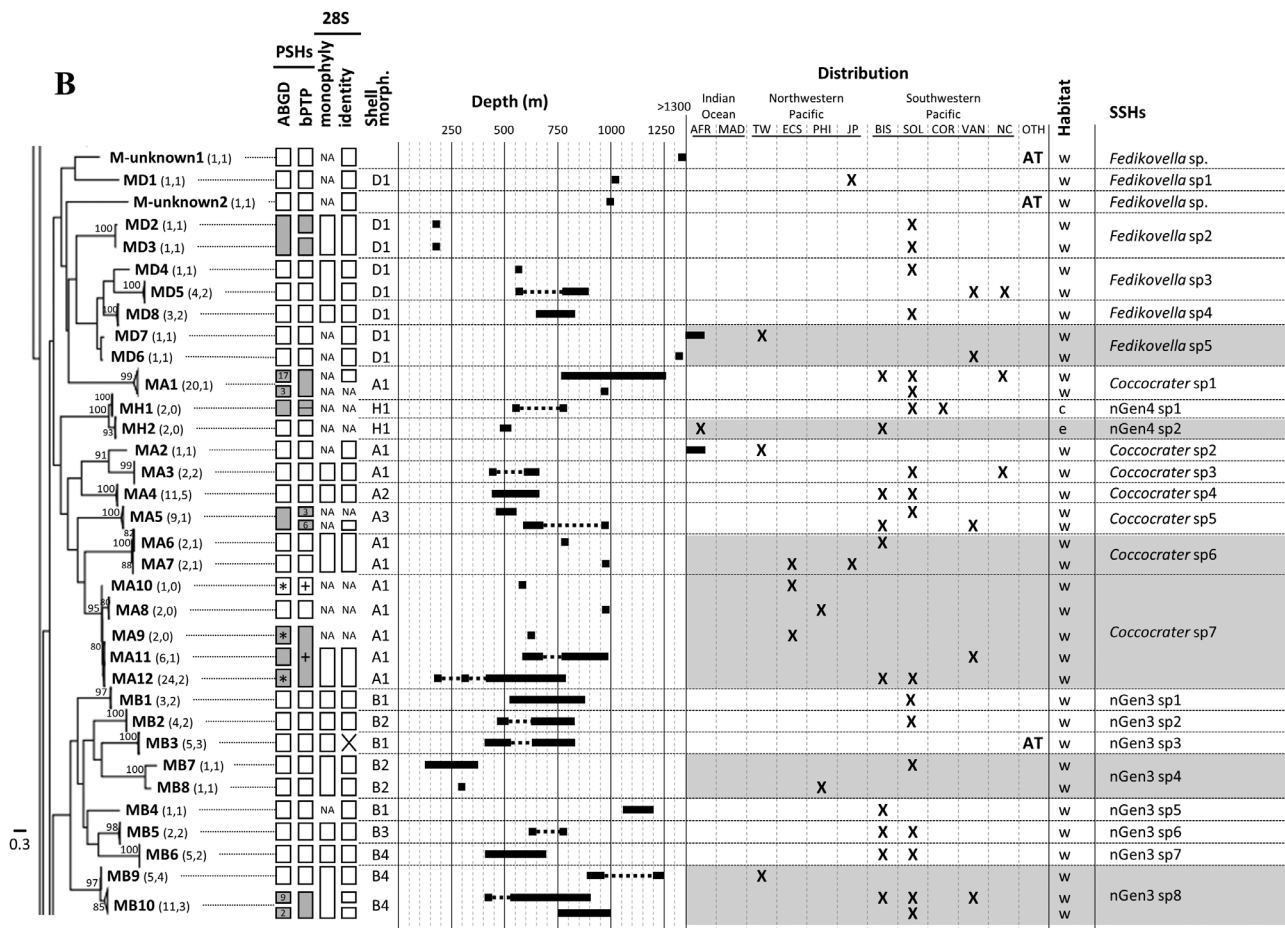

Figure 6. Continued. B, morphogroups MD, MH, MA and MB. See above (A) for explanatory notes.

part of the stations in the north-western Pacific; the other contained many of the stations in the north-western Pacific and one station in the south-western Pacific (Fig. 7).

PHYLOGENETIC RELATIONSHIPS AMONG SPECIES AND MORPHOGROUPS

The combined dataset of three genes (*cox1*, *H3* and 28S) consisted of 1421 aligned sites and 140 terminals, including 136 cocculinids, two bathysciadiids and two neomphaloids. The topologies of the inferred ML and BI trees were similar to each other but with a noticeable difference in the position of the clade MH (Supporting Information, Figs S4, S5). The ML tree is shown in Figure 8 with reference to PSH names. The Cocculinidae consisted of ten major clades and a single species (*Cocculina messingi*) that did not fall into any one of the major clades. The latter may be due to the quantity of missing data. Seven out of the ten clades were strongly supported with a bootstrap value (BS) of  $\geq 80\%$  and posterior probability (PP) of  $\geq 0.95$ . Six

of the seven well-supported clades corresponded to the morphogroups MD, MH, MB, ME, MG and MF. Conversely, the morphogroups MA and MC appeared to be non-monophyletic (Fig. 8). Morphogroup MC consisted of two distantly related clades that were denoted as MCI and MCII; the former was recovered as a sister clade to MB and the latter to MF. One species of MA was distinct from others in the same morphogroup and instead sister to the clade ME. However, this relationship was not supported with a significant BS value (73%) and we cannot exclude that MA is monophyletic. Overall, relationships among the ten major clades were not resolved except the sister group relationships between MB and MCI (BS = 92%, PP = 1.00), MF and MCII (86%, 1.00) and MG and MF + MCII (90%, 1.00) (Fig. 8; Supporting Information, Figs S4, S5).

PROTOCONCH AND RADULA

To further diagnose the cocculinid clades we used two morphological characters: the protoconch and

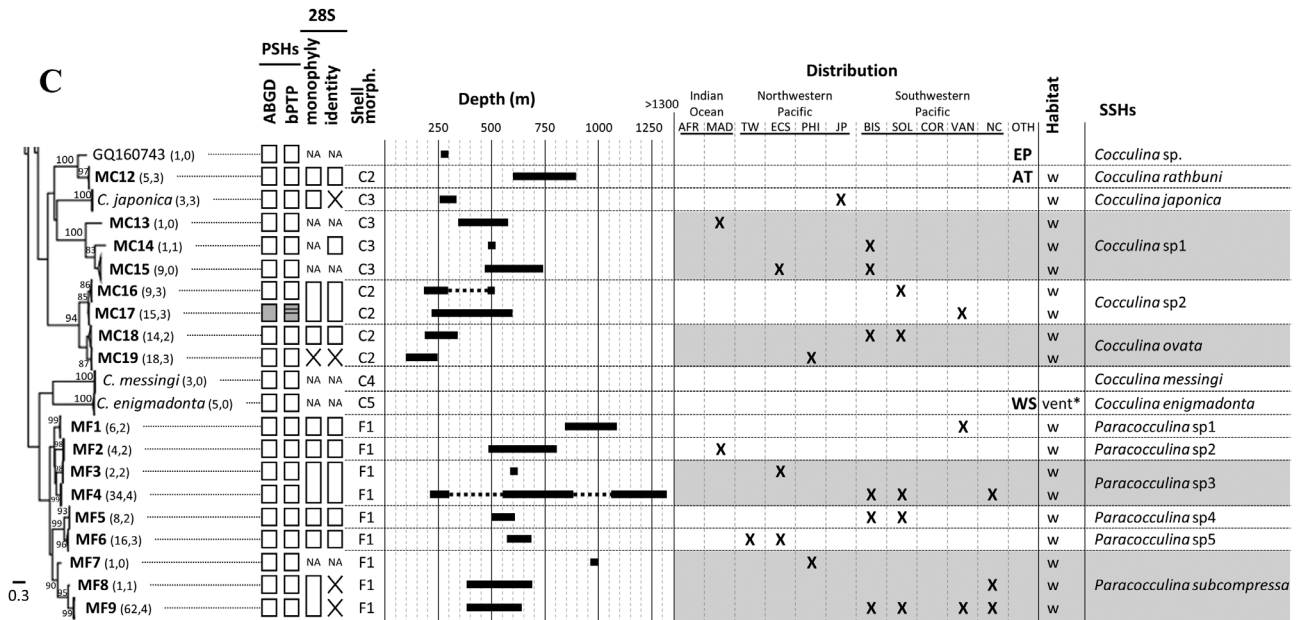

Figure 6. Continued. C, morphogroups MC and MF. See above (A) for explanatory notes.

radula. However, the protoconch of adult cocculinids are often eroded, potentially due to high dissolution rates of calcium carbonate in the deep sea. Cocculinid radulae are also known to be similar within a genus (e.g. Marshall, [1985] 1986; Haszprunar, 1987; McLean & Harasewych, 1995). Thus, we selected only 21 and 24 representative specimens for the examination of the protoconch (Figs 9, 10) and radula (Fig. 11), respectively.

Most protoconchs had a reticulated sculpture, whereas the individuals of clade MD displayed a concentric sculpture in the initial part of shell formation (Fig. 10A-D). The radula showed more variation between and within the clades (Fig. 8). Clade MA had two different types of the rachidian tooth: ‘unicuspid broad’ and ‘multicuspid broad’ (Fig. 11A-D). Among the species assigned to the polyphyletic morphogroup MC, those of clade MCI had two types of ‘unicuspid broad’ and ‘obsolete’ (Fig. 11G-J), whereas two species from MCII shared the same ‘acuspate-flat’ rachidian (Fig. 11K, L). One species examined for clade ME had the rachidian tooth of the ‘acuspate-flat’ (Fig. 11O). On the other hand, the clades MB, MD, MF and MG were diagnosed by their ‘unicuspid narrow’ (Fig. 11E, F), ‘multicuspid narrow’ (Fig. 11M, N), ‘acuspate-flat’ (Fig. 11P-R) and ‘obsolete’ (Fig. 11S-W) types of the rachidian, respectively. Finally, the only specimen examined for the clade MH had a rachidian tooth that can be classified into the ‘unicuspid broad’ type (Fig. 11X). This specimen was also unique in having unicuspid first lateral teeth; all other radulae examined here had multiple cusps in the first lateral tooth.

## DISCUSSION

### SPECIES DIVERSITY IN THE INDO-WEST PACIFIC

The integrative taxonomy as implemented in this study revealed a remarkable species richness of cocculinids with 51 delimited species occurring in the IWP. However, only 30 extant species have been described from the IWP and specimens examined in previous studies originated from a few restricted areas. These include five *Coccoligya* and one *Paracocculina* species around New Zealand and off the east coast of Australia (Fleming, 1948; Marshall, [1985] 1986), six *Cocculina* and two *Coccoligya* species around Japan (Kuroda & Habe, 1949; Hasegawa, 1997, 2009; Zhang & Zhang, 2018), one *Cocculina* species around the Philippines (Watson, 1886), one *Cococrater*, eight *Cocculina*, one *Paracocculina* species around Indonesia (Thiele in Martens, 1904; Schepman, 1908) and five *Cocculina* species off West Africa (Thiele, 1925). Our specimens were collected mainly in the vicinity of Papua New Guinea, the Solomon Islands, New Caledonia and Vanuatu, but also from around Madagascar, in the South China Sea, near Taiwan, the East China Sea and Japan. There is thus a relatively small overlap between our sampling areas and the known distribution ranges of the described cocculinid species. This suggests that many, if not most, of the species we delimited in this study are new to science as discussed below.

Based on our sampling, 21 inferred species seemed to have limited, regional distributions (see Fig. 1 for the 11 geographic regions defined in this study). Some other species showed wider ranges, but they generally

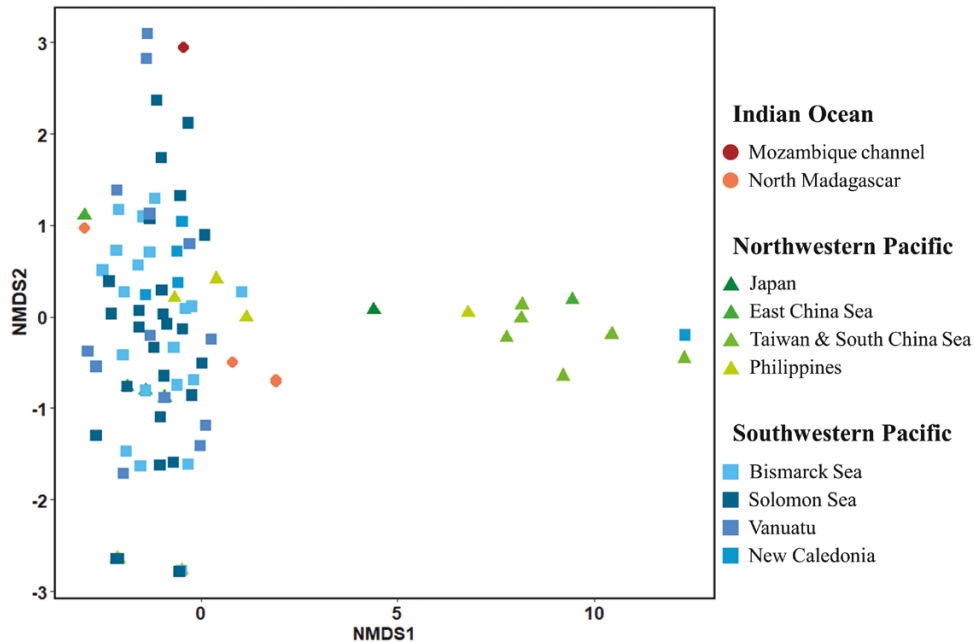

**Figure 7.** Nonmetric multidimensional scaling (NMDS) plot based on the Jaccard index for cocculinid species composition among 157 stations in the Indo-West Pacific.

occurred only in adjacent regions. Only a few had wide ranges. For instance, *Coccolpigya* sp. 3 ranged from Madagascar (MAD) in the West Indian Ocean to Taiwan (TW), the Philippines (PHI) and Solomon Sea (SOL) in the West Pacific; nGen4 sp2 was collected from the Mozambique Channel (AFR) and the Bismarck Sea (BIS). *Coccolcrater* sp. 7 is distributed in the East China Sea, Philippine waters, Bismarck Sea, Solomon Sea and Vanuatu waters. We found *Paracocculina subcompressa* in Philippine waters, the Bismarck Sea, the Solomon Sea, and Vanuatu and New Caledonian waters (Fig. 6C). This pattern of limited geographic range for most of the identified species is cohesive with the lecithotrophic larvae and the low instantaneous fecundity (less than 40 oocytes) in the life history (Young *et al.*, 2013). Indeed, low connectivity among populations is more frequently observed in deep-sea species with lecithotrophic or non-planktotrophic larvae (e.g. Plouviez *et al.*, 2009; Coykendall *et al.*, 2011; Young *et al.*, 2012; Chen *et al.*, 2015) than for those with planktotrophic larvae (e.g. Castelin *et al.*, 2012; Arellano *et al.*, 2014; Zaharias *et al.*, 2020). However, for such poorly dispersive organisms, interpretation should be made with caution as the sampling bias may also explain the apparent endemism (Castelin *et al.*, 2012).

Regional endemism was observed for most of the IWP cocculinid species we identified. This general trend contrasts with the case of nGen4 sp2 that gathered specimens collected in two distant regions:

the Mozambique Channel and the Bismarck Sea (Fig. 6B). The genetic divergence between the samples from these regions was low (i.e. *cox1* distance = 0.64%) despite a geographic distance of more than 5000 km between them. Strikingly, we collected this species always on chondrichthyan egg cases and it is sister to nGen4 sp1 that was collected exclusively on the skeleton of deep-sea corals. We should stress that plant remains are highly abundant around tropical islands, and these were thus well represented in the catches available in the MNHN's collection. Animal remains seem to be much more unevenly distributed on the deep-sea floor and were much rarer in our samples. The two species were never present in the abundant wood material and we can therefore regard them as truly specialized to either egg cases or coral skeletons. Their robust sister relationship (Figs 6B, 8) and vast geographic range of nGen4 sp1 suggest that habitat shift from the plesiomorphic wood to other biogenic substrates has been uncommon in the evolutionary history of the Cocculinidae. We found a few specimens of *Coccolpigya hispida* from the specimens collected during the experimentally deployed leaves and bones in New Caledonia (MG13, Fig. 6A; Samadi *et al.*, 2010), but those cases might represent rare, opportunistic use of substrates by an essentially wood-dwelling species. Additional efforts for sampling species associated to animal remains are still required to better understand the ecological radiation of cocculinid limpets.

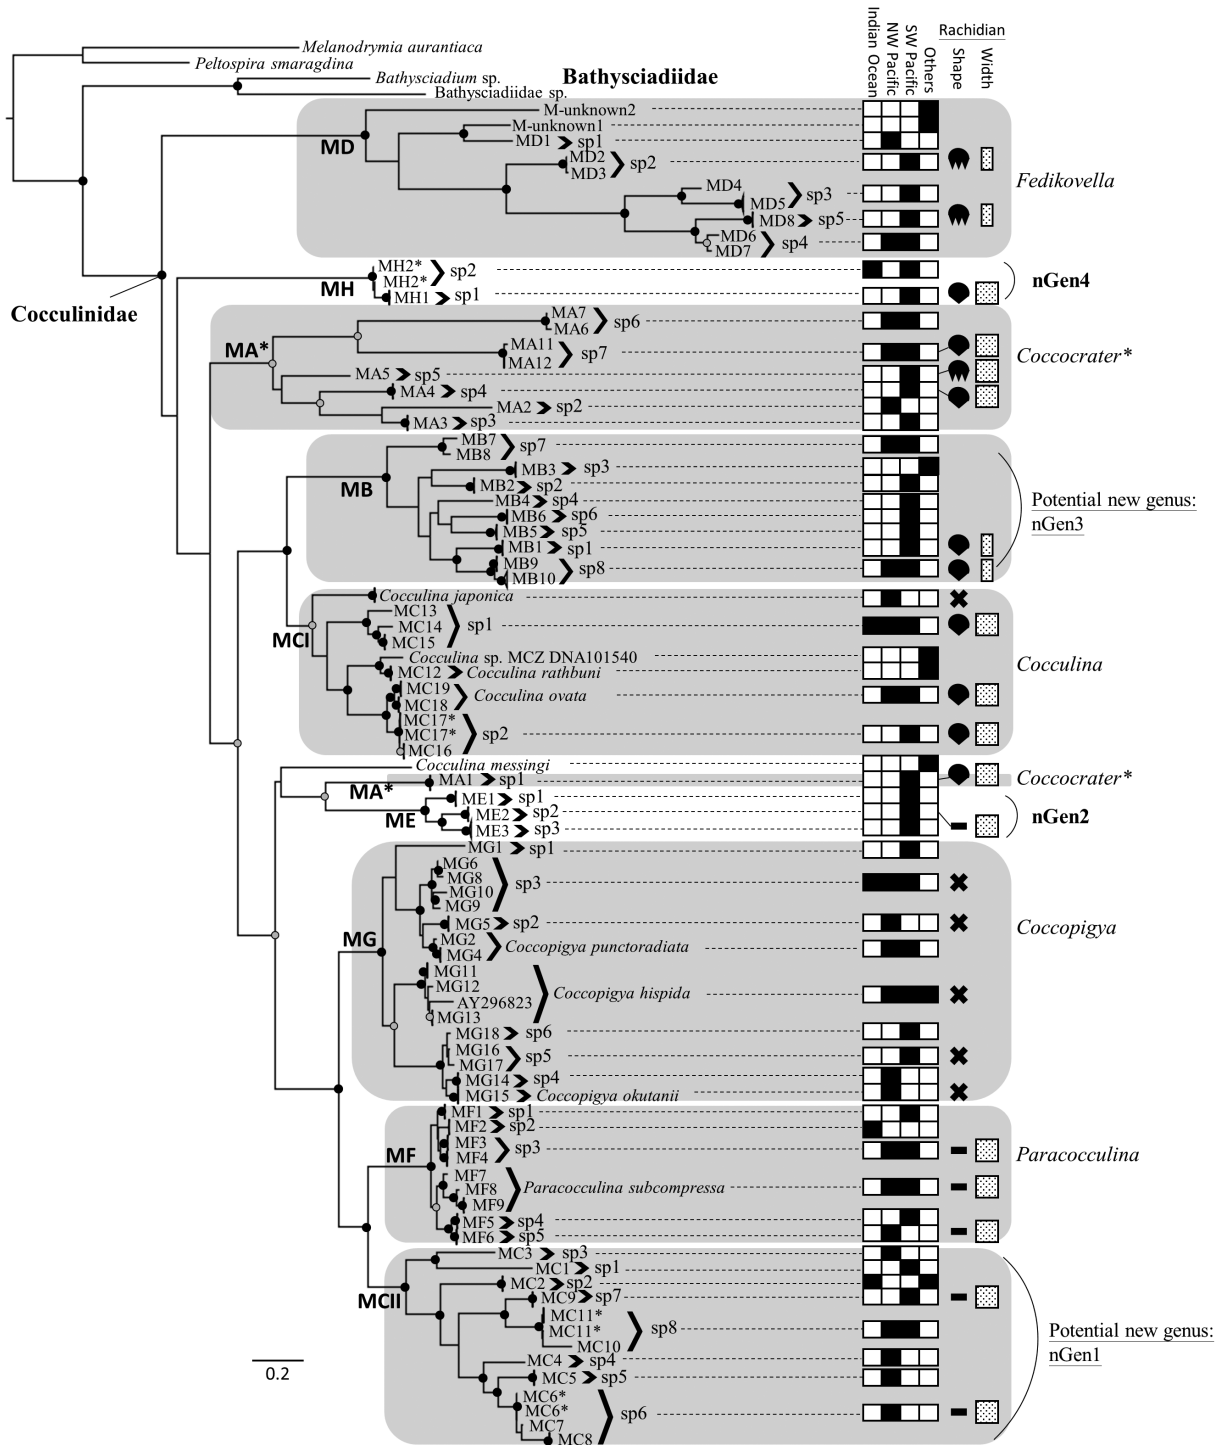

**Figure 8.** Combined three-gene ML tree for 138 cocculinid specimens (1421 bp from *cox1*, 28S and *H3*). Nodal supports are shown as circles on nodes. Nodes supported by both bootstrap value (BS)  $\geq 80\%$  and posterior probability (PP) of  $\geq 0.95$  are shown in black circles; nodes supported by only BS  $\geq 80\%$  or PP  $\geq 0.95$  are shown in grey circles. Nodes with BS of  $< 80\%$  and PP  $< 0.95$  are not marked with a circle. Morphogroup types are plotted on the tree (Supporting Information, Table S2). Geographic distribution of each species is shown with filled square(s). Different shapes of rachidian tooth of radula are denoted with following symbols: X, obsolete; —, acuspate; circle with three spikes, multicuspid; circle with a single spike, unicuspid. Dotted squares, broad or narrow, indicate relative width of rachidian tooth. Asterisks represent non-monophyletic morphogroups.

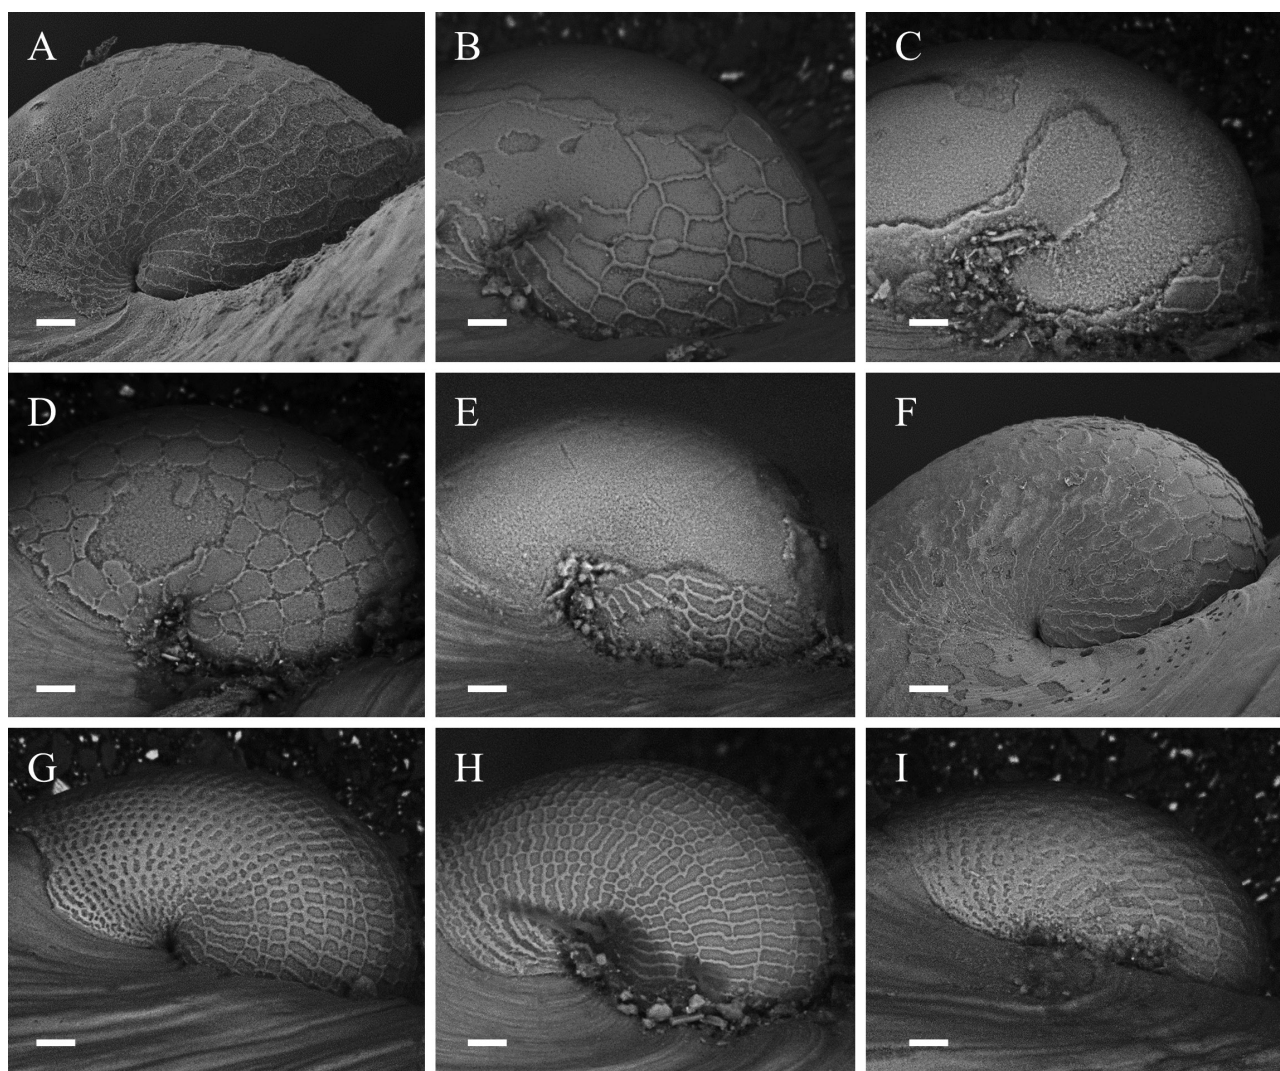

**Figure 9.** Protoconchs of sequenced specimens: A, MNHN-IM-2013-59217 (MA4); B, MNHN-IM-2013-42738 (MA8); C, MNHN-IM-2013-42581 (MA12); D, MNHN-IM-2013-62346 (MB7); E, MNHN-IM-2013-42709 (MC15); F, MNHN-IM-2013-42850 (MC18); G, MNHN-IM-2013-42752 (MC2); H, MNHN-IM-2013-42608 (MC9); I, HS215 (MC5). Scale bars = 20  $\mu$ m.

At the community scale, the sampling stations were divided into two main groups based on cocculinid species composition: one included most stations in the Indian Ocean and south-west Pacific and some stations in the north-west Pacific; the other one contained stations mostly from the north-west Pacific, but also one in the south-west Pacific (experimentally deployed organic materials; Samadi *et al.*, 2010) (Fig. 7). We found only 13 out of the 51 cocculinid species in both the north-west and south-west Pacific. Physical factors such as ocean currents might play an important role in shaping the community pattern of deep-sea animals (McClain & Hardy, 2010). Deep-sea planktotrophic larvae often migrate from the deep seabed to the photic

layer and are then transported thousands of kilometres across large geographic areas via surface currents like the Equatorial and Kuroshio Currents (e.g. Arellano *et al.*, 2014; Hilário *et al.*, 2015; Yahagi *et al.*, 2017, 2019, 2020). Conversely, most lecithotrophic developers such as cocculinids are probably transported by bottom currents. Although bottom currents generally move slowly across ocean floors (Stow *et al.*, 2002), such currents in the Southern Hemisphere may play an important role to transport lecithotrophic larvae of cocculinid species crossing the oceans. This might explain the homogeneous species composition and wide-ranging distributions of some species in the Indian and south-west Pacific Oceans (Figs 6, 7).



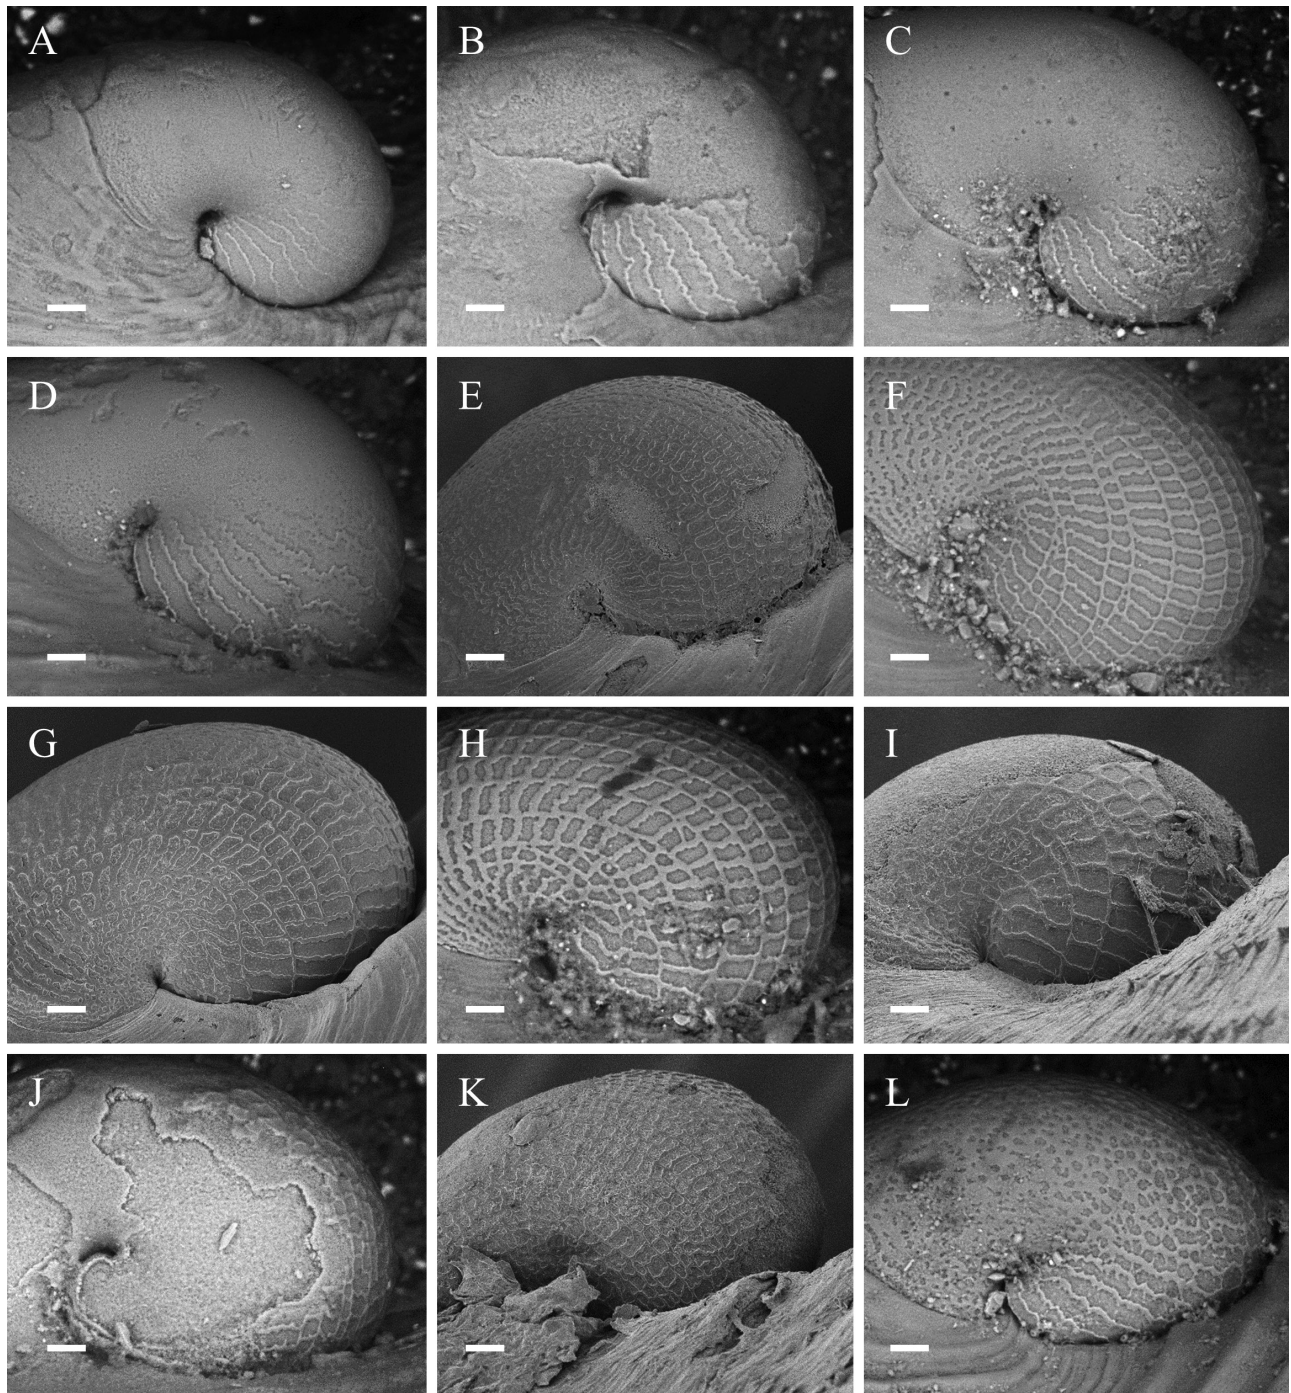

**Figure 10.** Protoconchs of sequenced specimens: A, MNHN-IM-2013-42570 (MD3); B, MNHN-IM-2013-42648 (MD4); C, MNHN-IM-2013-62341 (MD5); D, MNHN-IM-2013-62343 (MD8); E, MNHN-IM-2013-42654 (ME1); F, MNHN-IM-2013-42627 (MF9); G, MNHN-IM-2013-42878 (MF6); H, MNHN-IM-2013-42748 (MF2); I, MNHN-IM-2013-42907 (MG13); J, MNHN-IM-2013-42798 (MG8); K, MNHN-IM-2013-42896 (MG5); L, MNHN-IM-2009-11985 (MH1). Scale bars = 20  $\mu$ m.

#### CLASSIFICATION OF COCCULINID GENERA

We here provide the first DNA-based phylogeny of Cocculinidae, where ten major clades or lineages

are recognized (Fig. 8). Among the ten clades, five contain the type species of a named genus, or a species similar to the type, and can therefore be attributed

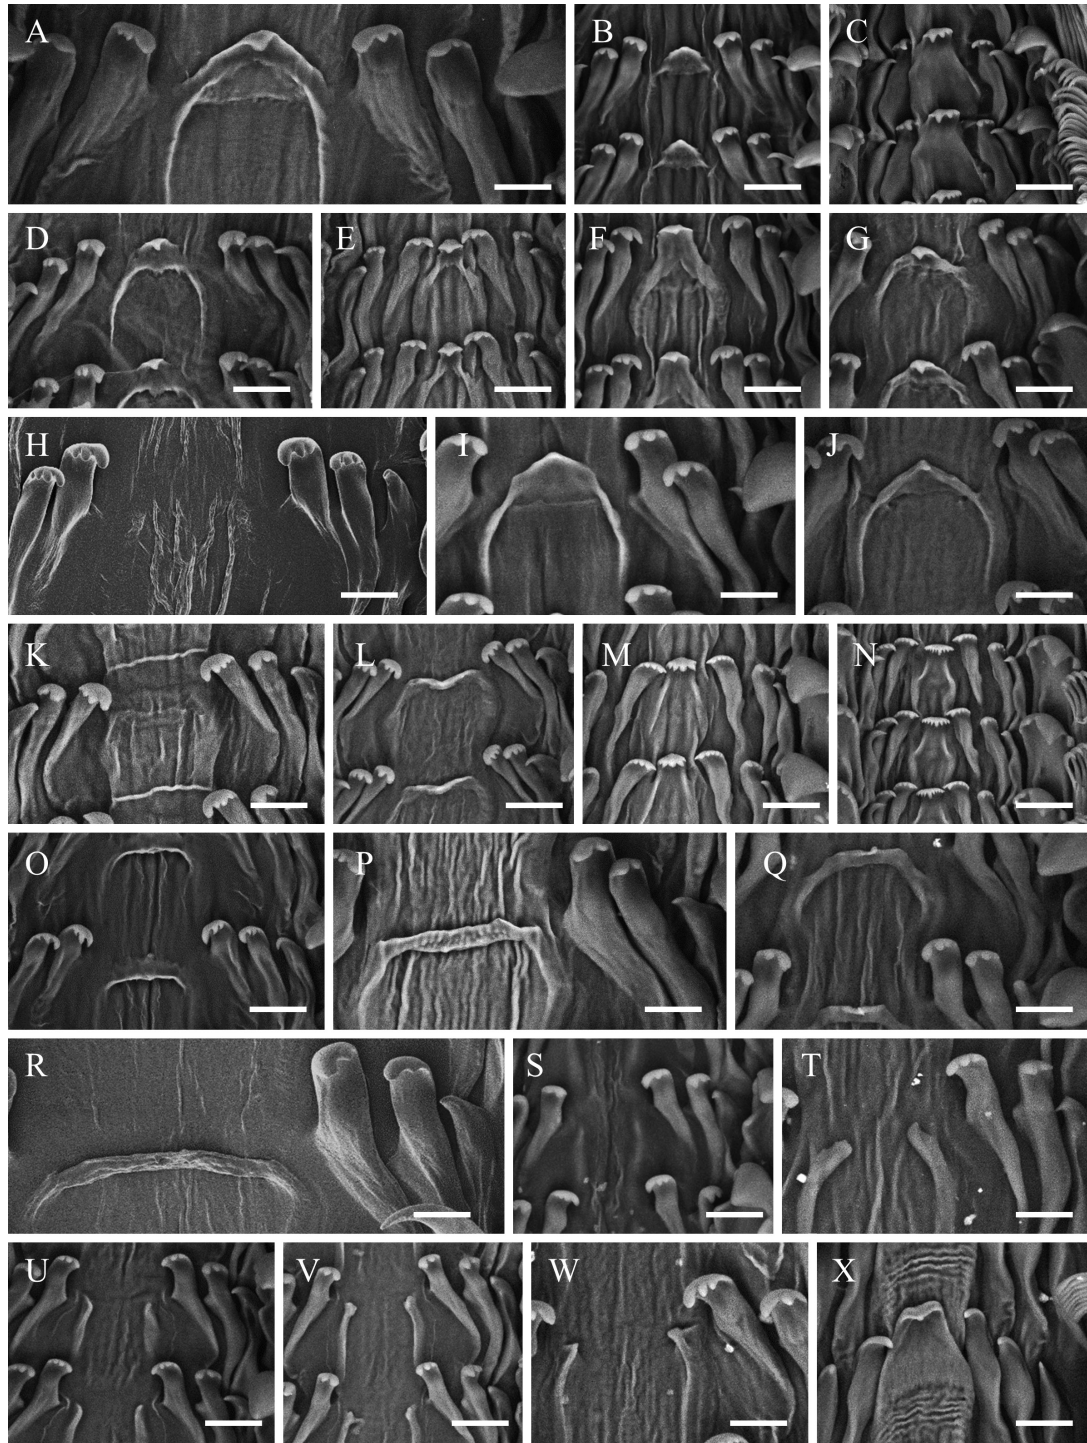

**Figure 11.** Radulae of sequenced specimens and an additional examined specimen of *C. japonica*: A, MNHN-IM-2013-42671 (MA1), ‘unicuspid broad’; B, MNHN-IM-2013-42687 (MA4), ‘unicuspid broad’; C, MNHN-IM-2013-62344 (MA5), ‘multicuspid broad’; D, MNHN-IM-2013-42828 (MA12), ‘unicuspid broad’; E, MNHN-IM-2013-42715 (MB1), ‘unicuspid narrow’; F, MNHN-IM-2013-42845 (MB10), ‘unicuspid narrow’; G, MNHN-IM-2013-42803 (MC14), ‘unicuspid broad’; H, *C. japonica*, ‘obsolete’; I, MNHN-IM-2013-42799 (MC18), ‘acuspate-flat’; J, MNHN-IM-2013-42968 (MC16), ‘unicuspid broad’; K, MNHN-IM-2013-42608 (MC9), ‘acuspate-flat’; L, HS217 (MC6), ‘acuspate-flat’; M, MNHN-IM-2013-42570 (MD3), ‘multicuspid narrow’; N, MNHN-IM-2013-42643 (MD8), ‘multicuspid narrow’; O, MNHN-IM-2013-42620 (ME2),

to the following generic names: *Cococrater* (MA), *Coccapigya* (MG), *Cocculina* (MCI), *Fedikovella* (MD) and *Paracocculina* (MF). The clades ME and MH each constitute an unnamed genus without doubt. The clades MB, MCII and MA1 as independent genera are also plausible, but less certain, partly due to insufficient support values of the tree topology (Fig. 8). We propose the following generic classification for the IWP cocculinids based on the phylogenetic reconstruction and morphological examination in this study (Table 2). These putative new genera and relevant species will be named and described in a subsequent study that notably requires examining the type specimens of all valid names of cocculinids.

### Cocculina

The species in the genus *Cocculina* as traditionally defined can be diagnosed from other cocculinids by having a copulatory organ originating from the oral lappet (Marshall, [1985] 1986; Haszprunar, 1987; McLean & Harasewych, 1995; Strong et al., 2003). This particular condition was observed in the specimens of morphogroups MB (nine species), MCI (five species) and MCII (eight species). However, we consider that MCI alone represents *Cocculina s.s.* with specimens identified as the type species *Cocculina rathbuni* Dall, 1882 (MC12, collected in the waters off Guadeloupe, French Caribbean, at depths of 600–900 m) in this clade (Fig. 8).

Morphogroup MB, recovered as the sister clade to MCI (*Cocculina s.s.*), mostly shows a unique, spindle shape of the shell and a teleoconch sculpture with plainly raised radial ribs (Table 1; Fig. 3C). These conditions are found in two described species, *Cocculina emsoni* McLean & Harasewych, 1995 from around the Bahamas and *Cocculina angulata* Watson, 1886 from the Philippines. However, our MB specimens collected from Caribbean Sea (MB3) have a narrow, oval shell shape compared to *C. emsoni* and MB specimens from IWP. Our MB specimens and *C. emsoni* further share the loose reticulate sculpture of the protoconchs (Fig. 10D) and narrow-shaped rachidian of the radula (Fig. 11E, F; McLean & Harasewych, 1995). *Cocculina angulata*, known only from the shell (Watson, 1886), also agrees with conditions in many MB specimens, but we cannot robustly identify it with any one of our species, including MB8 from the Philippines. We consider that the monophyletic nature and morphological uniqueness may warrant a new genus

(nGen3) for this group, but its relationship with MCI (*Cocculina s.s.*) remains to be solved (Figs 6B, 8).

Although MCII is phylogenetically distant from MCI, their specimens are similar to each other in external morphology. However, the two groups have different rachidian teeth of the radula. The specimens of MCII have an ‘acusate-flat’ type (Fig. 11K, L) similar to those in its sister clade MF (Fig. 11P–R). On the contrary, the rachidians in MCI and its sister lineage MB are of different types: the former being ‘acusate-flat,’ ‘unicuspid broad’ or ‘obsolete’ (Fig. 11G–J), while the latter are ‘unicuspid narrow’ (Fig. 11E–F). However, we examined only two radulae from MCII and more data are needed to confirm these as diagnostic traits of different genera. Regarding the bathymetric distribution, the specimens of MCI were sampled at shallower depths (50–365 m deep) than those of MCII (105–900 m) and MB (170–1250 m) (Fig. 6). This might further support the taxonomic uniqueness of the clade MCII as another new genus (nGen1). The previous morphology based on cocculinid phylogeny by Strong et al. (2003) did not detect this putative genus within *Cocculina* probably as a result of the geographic sampling centred in the Atlantic Ocean.

The phylogenetic positions of *Cocculina messingi* and *Cocculina enigmadonta* Chen & Linse, 2020 are both unresolved. The former was grouped with the clade MA1 + ME without support (Fig. 8); the latter was sister to *C. messingi* in the *cox1*-based ML tree, but again without support (Fig. 6C). As we only obtained *cox1* sequences for these two species, these affinities are uncertain. The type specimen of *C. messingi* was collected around the Bahamas at 412 m in depth. Its copulatory organ originated from the right oral lappet and conforms to the diagnosis of *Cocculina s.l.*, but its teleoconch with raised concentric growth lines and fine radial striae (McLean & Harasewych, 1995: fig. 12) is similar to the concentric sculpture we classified (Fig. 3D), which can only be observed in nGen4 sp4 (Supporting Information, Table S2). *Cocculina enigmadonta* is the only cocculinid species found so far in the Southern Ocean, and also the only one from the hydrothermal vent environment (Chen & Linse, 2020). It has a unique type of radula and a copulatory organ similar to that of *Paracocculina* (Chen & Linse, 2020: fig. 5C). We thus leave *C. messingi* and *C. enigmadonta* in *Cocculina s.l.*, waiting for more data for future reclassification.

Among other IWP species described under this genus, *Cocculina japonica* Dall, 1907 was easily

‘acusate-flat’; P, MNHN-IM-2013-42992 (MF9), ‘acusate-flat’; Q, MNHN-IM-2013-40565 (MF6), ‘acusate-flat’; R, HS227 (MF3) ‘acusate-flat’; S, MNHN-IM-2013-42732 (MG10), ‘obsolete’; T, MNHN-IM-2013-42863 (MG11), ‘obsolete’; U, MNHN-IM-2013-42896 (MG5), ‘obsolete’; V, MNHN-IM-2013-42874 (MG15), ‘obsolete’; W, MNHN-IM-2013-42851 (MG16), ‘obsolete’; X, MNHN-IM-2009-11985 (MH1), ‘unicuspid broad’. Scale bars = 20 µm.

**Table 2.** Diagnoses of cocculinid genera (with unique conditions shown in bold)

| Genus                | Protoconch sculpture         | Teleoconch sculpture                 | Copulatory organ                    | Epipodial tentacles | Shell shape    | Habitat                                        | References                                                                  |
|----------------------|------------------------------|--------------------------------------|-------------------------------------|---------------------|----------------|------------------------------------------------|-----------------------------------------------------------------------------|
| <i>Cocculina</i>     | Reticulate                   | Radial, smooth or concentric         | On oral lappet or foot              | Present             | Round          | Wood, dolphin skull                            | Haszprunar, 1987; McLean & Harasewych, 1995; Zhang & Zhang, 2018            |
| <i>Coccolpigya</i>   | Reticulate                   | <b>Spinose</b>                       | Modified right cephalic tentacle    | <b>Absent</b>       | Round          | Wood, leaf, bone                               | Marshall, [1985] 1986; McLean & Harasewych, 1995; see main text for habitat |
| <i>Cocco crater</i>  | Reticulate                   | Radial or plainly raised radial      | Modified right cephalic tentacle    | Present             | Round          | Wood                                           | Haszprunar, 1987; McLean & Harasewych, 1995; Strong <i>et al.</i> , 2003    |
| <i>Paracocculina</i> | Reticulate                   | Radial                               | On foot or oral lappet              | Present             | Round          | Wood                                           | Haszprunar, 1987; Strong <i>et al.</i> , 2003                               |
| <i>Fedikovella</i>   | <b>Concentric</b> Reticulate | Reticulate                           | Right cephalic tentacle; unmodified | Present             | Round          | Wood                                           | Moskaley, 1976; McLean & Harasewych, 1995; Leal & Harasewych, 1999          |
| <i>Teuthirostria</i> | Smooth                       | Reticulate                           | Modified right cephalic tentacle    | Present             | Round          | <b>Cephalopod beak</b>                         | Moskaley, 1976; Leal & Harasewych, 1999; Strong <i>et al.</i> , 2003        |
| <i>Macleaniella</i>  | Smooth                       | <b>Radial (with an inner septum)</b> | Modified right cephalic tentacle    | Present             | Round          | Wood                                           | Leal & Harasewych, 1999                                                     |
| nGen1                | Reticulate                   | Radial, smooth or concentric         | On oral lappet                      | Present             | Round          | Wood                                           | This study                                                                  |
| nGen2                | Reticulate                   | Smooth                               | <b>On mantle margin</b>             | Present             | Round          | Wood                                           | This study                                                                  |
| nGen3                | Reticulate                   | Plainly raised radial                | On oral lappet                      | Present             | <b>Spindle</b> | Wood                                           | This study                                                                  |
| nGen4                | Reticulate                   | Concentric or smooth                 | Modified right cephalic tentacle    | Present             | Round          | <b>Chondrichthyan egg case, deep-sea coral</b> | This study                                                                  |

recognized in our material and fell into *Cocculina* s.s. (MCI) in the present study. The information available in the species descriptions of *Cocculina capulus* Thiele, 1925, *Cocculina dofleini* Thiele, 1925, *Cocculina fragilis* Thiele, 1925, *Cocculina pellita* Thiele, 1925, *Cocculina similis* Thiele, 1925 and *Cocculina vestita* Thiele, 1925, did not allow us to confidently attribute them to our SSHs or to the clades identified here. Seven species names proposed by Schepman (1908) for Indonesian material were also difficult to link to our specimens, because the original descriptions were based mainly on the shell and little on radular morphology. *Cocculina ovata* Schepman, 1908 might be an exception. McLean (1987) attributed numerous specimens collected at 187–210 m deep in the Philippines to this species. Among our SSHs from similar depths of neighbouring areas, the one made up of MC19 (Fig. 6C) showed the conchological features of *C. ovata* redescribed by McLean (1987), perhaps suggesting its identity at the species level. The shape of the rachidian tooth of MC18 (Fig. 11I) did not exactly match the condition described for *C. ovata* by Schepman (1908) and McLean (1987). However, this inconsistency might have resulted from worn teeth or different angles in SEM shots and examination of more radulae is needed to confirm our species identification.

Five more species have been described from the IWP under the genus *Cocculina*: *Cocculina pacifica* Kuroda & Habe, 1949, *Cocculina tosaensis* Kuroda & Habe, 1949, *Cocculina surugaensis* Hasegawa, 1997 and *Cocculina tenuitesta* Hasegawa, 1997, all on sunken wood off Japanese coasts, and *Cocculina delphinicola* Zhang & Zhang, 2018 from a dolphin skull at a depth of 300–400 m in the East China Sea (Zhang & Zhang, 2018). Although none of them were found in our material, we believe that the first species should be moved from the genus to either *Fedikovella* ('*C.*' *pacifica*; see below) or Lepetellidae ('*C.*' *tosaensis*; see Hasegawa, 1997: 65). The sequences we gathered from GenBank similarly illustrated the difficulty of morphological identification at both genus and species levels. Examples include published sequences attributed to *Coccopigya punctoradiata* (Supporting Information, Table S1) that were clustered with an entirely different species (MC5) in a potential new genus (nGen1).

### Coccopigya

*Coccopigya* is the most easily recognized genus in Cocculinidae. It is distinguished from other cocculinids by having periostracal spines and by lacking epipodial tentacles (Marshall, [1985] 1986; Haszprunar, 1987). All specimens attributed to MG, corresponding to nine distinct species (Fig. 6A), displayed both conditions and were thus considered as the members of *Coccopigya* (Tables 1, 2).

Specimens of MG2–MG4 and MG15 were identified respectively as *Coccopigya punctoradiata* (Kuroda & Habe, 1949) and *Coccopigya okutanii* Hasegawa, 1997 based on their morphology and collection sites (Japan). The specimens of MG11–MG13, gathered into a single SSH, were attributed to *Coccopigya hispida* based on a published *cox1* sequence from a paratype of the species (AY296823, voucher NMNZ M075188) (Fig. 6A).

### Cococrater

The use of the right cephalic tentacle as a copulatory organ is considered plesiomorphic within the Cocculinoidea and shared by the species of *Cococrater*, *Coccopigya*, *Fedikovella*, *Macleaniella* and *Teuthirostria* (Table 2; Strong et al., 2003). This condition was observed in morphogroups MA, MD, MG and MH (Table 1; Fig. 6). Of these, MD and MG were attributed to *Fedikovella* and *Coccopigya*, respectively, and MH to an undescribed genus with ecological uniqueness (see below). The morphological and ecological features of *Macleaniella* and *Teuthirostria* do not match any of our specimens (see section *Macleaniella* and *Teuthirostria*). We thus consider morphogroup MA as *Cococrater*.

The occurrence of *Cococrater* in the IWP region, including the type species *Cococrater radiatus* (with a type locality off western Sumatra), suggests a generic identity for one or both of the two MA lineages. As we cannot exclude that MA is monophyletic (see above) and the original description of *Cococrater radiatus* by Thiele in Martens (1904) was too simple to be linked to any of our SSHs, both lineages are assigned here to *Cococrater* with a possibility of establishing a new genus in the future pending more data on their relationships and the type specimen of *Cococrater radiatus*.

### Fedikovella

The genus *Fedikovella* contains two described species. The type species *Fedikovella caymanensis* Moskalev, 1976 was described from a hadal depth (6800 m) in the Cayman Trough. *Fedikovella beanii* (Dall, 1882) was described from the north-western part of the Atlantic (lectotype USNM 333751 from 613 m deep, off Martha's Vineyard Island, MA, USA) and has been collected from the Lesser Antilles and Martinique at around 400 m to 1000 m deep (McLean & Harasewych, 1995). The concentric sculpture of the protoconch and reticulate ribs of the teleoconch are diagnostic characters of the genus (Moskalev, 1976; Marshall, [1985] 1986; McLean & Harasewych, 1995; Leal & Harasewych, 1999). The right cephalic tentacle of *F. caymanensis* is supposedly used as a copulatory organ but not hypertrophied or modified (Leal & Harasewych, 1999). The rachidian,

and first and second lateral teeth are all multicuspid (Leal & Harasewych, 1999). These conditions were found in our specimens of the clade MD (Tables 1, 2; Figs 10A–D, 11M, N).

An additional MD specimen from the Lesser Antilles at 500–550 m deep (MNHN-IM-2013-60187; Supporting Information, Table S1) was grouped with the IWP specimens in the 28S analysis (Supporting Information, Fig. S2), supporting the identity of this clade as *Fedikovella* from a geographic perspective. This clade also included species from off Faro, Portugal (M-unknown1, AORI\_YK1662) and from off Costa Rica, east Pacific (M-unknown2, SMNH-108733) (Fig. 8). '*Cocculina pacifica*' described from off Japan should likewise be attributed to *Fedikovella* based on its shell, radula and copulatory organ (Kuroda & Habe, 1949: pl. 3, fig. 5; Hasegawa, 1997: fig. 5). *Fedikovella* thus occupies a wide range, both geographically (worldwide) and bathymetrically (bathyal to hadal zones). We should stress that Strong *et al.* (2003) found *Fedikovella* + *Teuthirostria* as sister to the rest of the cocculinids, but this sister group relationship (*Fedikovella* vs. all other examined cocculinids, as we did not include *Teuthirostria* in the analysis) is only weakly supported in the molecular tree we obtained.

### Paracocculina

*Paracocculina* contains two named species: the type species *P. laevis* collected from off west of Sumatra Island at 614 m deep (Thiele in Martens, 1904) and *P. cervae* from New Zealand in a depth range of 18–891 m (Marshall, [1985] 1986; Haszprunar, 1987). Marshall (1994) recorded *P. cervae* from wood, whale bones and sunken algal holdfasts. This genus can be differentiated from other cocculinids by their foot-originated copulatory organ (Haszprunar, 1987; but see Strong *et al.*, 2003: 122), a condition observed in all our specimens attributed to the clade MF (Fig. 4B; Table 1; Supporting Information, Table S2). The MF specimens were collected from a wide geographic area, ranging from the western Indian Ocean (Madagascar) to the western Pacific (New Caledonia). Although we did not survey west off Sumatra (type locality of *P. laevis*), the identity of the clade MF as *Paracocculina* seems to be well justified with the unique position of the copulatory organ.

Among GenBank data the sequence GQ160744 (Supporting Information, Table S1; MNHN-IM-2009-5054 from the Solomon Sea) was grouped with MF9 (Supporting Information, Fig. S1). This GenBank sequence has been attributed to '*Cocculina subcompressa*', a species described from south-west of Timor Island (216 m; Schepman, 1908). The widespread distribution of MF7–MF9, ranging from the Philippines to New Caledonia, and from 350 to 1000 m deep (Fig. 6C), may potentially justify the

species identification (as *Paracocculina subcompressa*). Unfortunately, Schepman (1908) did not mention the position of the copulatory organ in the type material and our identification thus remains tentative.

### Clades ME and MH

Clade ME contained three species from the Bismarck Sea, the Solomon Sea and Vanuatu (Fig. 6A). These species displayed a remarkably unique position of a presumed copulatory organ on the right mantle margin close to the head (Table 1; Fig. 4D). No one has yet reported this type of copulatory organ for any cocculinids. Further examination of the anatomy and the histology is thus mandatory. The phylogenetic position (Fig. 8) combined with the morphology suggests to treat this clade as a new genus (nGen2) awaiting formal description.

Clade MH contained specimens from 'non-wooden' habitats. The specimens of MH1 were found on nodes of deep-sea bamboo corals (Isididae), which are formed by a specific protein matrix (Ehrlich *et al.*, 2006), whereas MH2 were on the egg cases of chondrichthyes (sharks and/or rays). We consider that such unique habitats and the independent phylogenetic position they occupy (Fig. 8) justify erection of another new genus (nGen4).

### Macleaniella and Teuthirostria

These cocculinid genera were established for species from abyssal or hadal depths (Moskalev, 1976; Leal & Harasewych, 1999). *Macleaniella moskalevi* is the monotypic species of the genus, known exclusively from the lower abyssal and hadal zones of the Puerto Rico Trench (5179–8595 m). It is easily recognized by a large internal septum of the shell as a unique character within Cocculinidae (Leal & Harasewych, 1999). *Teuthirostria cancellata* Moskalev, 1976, also the type and only species of the genus, was collected from a dead cephalopod beak from a depth of 5200–5540 m off northern Peru (Moskalev, 1976). This species was recovered as a sister group to *Fedikovella* by morphology (Strong *et al.*, 2003). We did not find any IWP specimen that was comparable in morphological or ecological characteristics, suggesting that the two genera are endemic to the Atlantic (*Macleaniella*) or the East Pacific (*Teuthirostria*), or that they are restricted to the lower abyssal and hadal zones.

### CONCLUSION

Our study, based on broadly sampled material, constitutes to date the most comprehensive biodiversity survey on cocculinid limpets. We identified 51 species

from organic falls on the deep-sea floor in the Indo-West Pacific. These included six named species (*Coccoligya punctoradiata*, *Coccoligya hispida*, *Coccoligya okutanii*, *Cocculina japonica*, *Cocculina ovata* and *Paracocculina subcompressa*) and 45 other, presumably new, species of the family. We inferred the phylogenetic relationships among cocculinids for the first time based on a multigene dataset. We recognized five named and four unnamed genera: *Cocculina* (eight species), *Cococrater* (7), *Coccoligya* (9), *Fedikovella* (5), *Paracocculina* (6), new genus 1 (nGen1: 8), nGen2 (3), nGen3 (8) and nGen4 (2); diagnostic morphological and ecological traits are summarized for all genera in Table 2. These numbers of genera and species are much higher than previously recognized in the Indo-West Pacific, although a larger part of the oceans of the world remains to be sampled. We thus estimate that additional sampling efforts will reveal more taxa, especially given the inherent patchiness of their habitats. Drawing a full picture of the diversity of this perplexing animal group requires further research into other oceans and habitats.

#### ACKNOWLEDGEMENTS

We thank all principal investigators and participants of the ‘Tropical Deep-Sea Benthos’ expeditions AURORA 2007, BIOPAPUA, BOA1, CONCALIS, DONGSHA 2014, EBISCO, EXBODI, KAVANAN 2018, KAVIENG 2014, MADEEP, MAINBAZA, KARUBENTHOS 2, MIRIKY, NANHAI 2014, NORFOLK 2, PANGLAO 2004, PANGLAO 2005, PAPUA NIUGINI, SALOMON 2, SALOMONBOA 3 and TAIWAN 2013 conducted by MNHN and IRD, and also NTU and NTOU for Taiwanese expeditions. Additional to MNHN, IRD, NTU and NTOU support, some of these expeditions were conducted with financial support notably from Flotte Océanographique Française (DOI numbers: 10.17600/15005400, 10.17600/10100040, 10.17600/5100060, 10.17600/8100010, 0.17600/5100080, 10.17600/11100080, 10.17600/14004400, 10.17600/14004000, 10.17600/3100030, 10.17600/18000841, 10.17600/4100090, 10.17600/7100070), INEE-CNRS and Labex BCDiv (ANR-10-LABX-0003-BCDiv). We thank B. Buge for the curation of specimens; J. Abdelkrim, A. Dettai and all staff from the Service de Systématique Moléculaire (SSM-UMS2700) for their help in managing and analysing molecular data; L. Genio and M. Cunha, University of Aveiro, for a specimen from the expedition James Cook 10 during the EU Hermes Project; A. Warén, P. Bouchet, V. Héros, P. Lozouet, P. Maestrati, L. Galindo and M. Caballer for discussion and collection management; S. Pont, P. Maestrati and L. Corbari for SEM shots. This

research was mainly supported by research funding from the Ministry of Science and Technology, Taiwan (MOST 102-2923-B-002-001-MY3, MOST 107-2611-M-002-007-, MOST 108-2611-M-002-012-MY2 and MOST 110-2611-M-002-013- to W.-J.C.), the French National Research Agency (ANR 12-ISV7-0005-01 to S Samadi) and the Japan Society for the Promotion of Science (KAKENHI 18H02494 and 19KK0385 to Y.K.).

#### DATA AVAILABILITY

The data underlying this article are available in the article and its online supplementary material, and in the GenBank Nucleotide Database at <https://www.ncbi.nlm.nih.gov/genbank/> and can be accessed with the GenBank accession numbers OL800712–OL801212 and OL956554–OL956700.

#### REFERENCES

- Amon DJ, Copley JT, Dahlgren TG, Horton T, Kemp KM, Rogers AD, Glover AG. 2017.** Observations of fauna attending wood and bone deployments from two seamounts on the southwest Indian Ridge. *Deep Sea Research Part II: Topical Studies in Oceanography* **136**: 122–132.
- Ardila NE, Harasewych MG. 2005.** Cocculinid and pseudococculinid limpets (Gastropoda: Cocculiniformia) from off the Caribbean coast of Colombia. *Proceedings of the Biological Society of Washington* **118**: 344–366.
- Arellano SM, Van Gaest AL, Johnson SB, Vrijenhoek RC, Young CM. 2014.** Larvae from deep-sea methane seeps disperse in surface waters. *Proceedings of the Royal Society B: Biological Sciences* **281**: 20133276.
- Bouchet P, Héros V, Lozouet P, Maestrati P. 2008.** A quarter-century of deep-sea malacological exploration in the south and west Pacific: where we do we stand? How far to go? In: Héros V, Cowie RH, Bouchet P, eds. *Tropical deep-sea benthos 25*. Paris: Mémoires du Muséum national d’Histoire naturelle, 9–40.
- Bouchet P, Rocroi J-P, Hausdorf B, Kaim A, Kano Y, Nützel A, Parkhaev P, Schrödl M, Strong EE. 2017.** Revised classification, nomenclator and typification of gastropod and monoplacophoran families. *Malacologia* **61**: 1–526.
- Castelin M, Lorion J, Brisset J, Cruaud C, Maestrati P, Utge J, Samadi S. 2012.** Speciation patterns in gastropods with long-lived larvae from deep-sea seamounts. *Molecular Ecology* **21**: 4828–4853.
- Chen C, Copley JT, Linse K, Rogers AD. 2015.** Low connectivity between ‘scaly-foot gastropod’ (Mollusca: Peltospiridae) populations at hydrothermal vents on the southwest Indian Ridge and the central Indian Ridge. *Organisms Diversity & Evolution* **15**: 663–670.
- Chen C, Linse K. 2020.** From wood to vent: first cocculinid limpet associated with hydrothermal activity discovered in the Weddell Sea. *Antarctic Science* **32**: 354–366.

- Chisholm LA, Morgan JAT, Adlard RD, Whittington ID. 2001.** Phylogenetic analysis of the Monocotylidae (Monogenea) inferred from 28S rDNA sequences. *International Journal for Parasitology* **31**: 1537–1547.
- Colgan DJ, McLauchlan A, Wilson GDF, Livingston SP, Edgecombe GD, Macaranas J, Cassis G, Gray MR. 1998.** Histone H3 and U2 snRNA DNA sequences and arthropod molecular evolution. *Australian Journal of Zoology* **46**: 419–437.
- Costello MJ, Coll M, Danovaro R, Halpin P, Ojaveer H, Miloslavich P. 2010.** A census of marine biodiversity knowledge, resources, and future challenges. *PLoS One* **5**: e12110.
- Coykendall DK, Johnson SB, Karl SA, Lutz RA, Vrijenhoek RC. 2011.** Genetic diversity and demographic instability in *Riftia pachyptila* tubeworms from eastern Pacific hydrothermal vents. *BMC Evolutionary Biology* **11**: 96.
- Cunha MR, Matos FL, Génio L, Hilário A, Moura CJ, Ravara A, Rodrigues CF. 2013.** Are organic falls bridging reduced environments in the deep sea? – Results from colonization experiments in the Gulf of Cádiz. *PLoS One* **8**: e76688.
- Dall WH. 1882.** On certain limpets and chitons from the deep waters off the eastern coast of the United States. *Proceedings of the United States National Museum* **4**: 400–414.
- Danovaro R, Fanelli E, Canals M, Ciuffardi T, Fabri MC, Taviani M, Argyrou M, Azzurro E, Bianchelli S, Cantafaro A, Carugati L, Corinaldesi C, De Haan WP, Dell'Anno A, Evans J, Fogliani F, Galil B, Gianni M, Goren M, Grecob S, Grimalt J, Güell-Bujons Q, Jadaud A, Knittweis L, Lopez JL, Sanchez-Vidal A, Schembrij PJ, Snelgrove P, Vaz S, the IDEM Consortium, Angeletti L, Barsanti M, Borg JA, Bosso M, Brind'Amour A, Castellan G, Conte F, Delbono I, Galgani F, Morgana G, Prato S, Schirone A, Soldevila E. 2020.** Towards a marine strategy for the deep Mediterranean Sea: analysis of current ecological status. *Marine Policy* **112**: 103781.
- Distel DL, Baco AR, Chuang E, Morrill W, Cavanaugh C, Smith CR. 2000.** Do mussels take wooden steps to deep-sea vents? *Nature* **403**: 725–726.
- Ehrlich H, Etnoyer P, Litvinov SD, Olenikova MM, Domaschke H, Hanke T, Born R, Meissner H, Worch H. 2006.** Biomaterial structure in deep-sea bamboo coral (Anthozoa: Scleractinia: Isididae): perspectives for the development of bone implants and templates for tissue engineering. *Materialwissenschaft und Werkstofftechnik* **37**: 552–557.
- Fleming CA. 1948.** New species and genera of marine Mollusca from the Southland fiords. *Transactions and Proceedings of the Royal Society of New Zealand* **77**: 72–92.
- Felsenstein J. 1985.** Confidence-limits on phylogenies - an approach using the bootstrap. *Evolution* **39**: 783–791.
- Folmer O, Black M, Hoeh W, Lutz R, Vrijenhoek R. 1994.** DNA primers for amplification of mitochondrial cytochrome c oxidase subunit I from diverse metazoan invertebrates. *Molecular Marine Biology and Biotechnology* **3**: 294–299.
- Fujiwara Y, Kawato M, Noda C, Kinoshita G, Yamanaka T, Fujita Y, Uematsu K, Miyazaki J-I. 2010.** Extracellular and mixotrophic symbiosis in the whale-fall mussel *Adipicola pacifica*: a trend in evolution from extra- to intracellular symbiosis. *PLoS One* **5**: e11808.
- Harbour RP, Smith CR, Simon-Nutbrown C, Cecchetto M, Young E, Coral C, Sweetman AK. 2021.** Biodiversity, community structure and ecosystem function on kelp and wood falls in the Norwegian deep sea. *Marine Ecology Progress Series* **657**: 73–91.
- Hasegawa K. 1997.** Sunken wood-associated gastropods collected from Suruga Bay, Pacific side of the central Honshu, Japan, with descriptions of 12 new species. *National Science Museum Monographs* **12**: 59–123.
- Hasegawa K. 2009.** Upper bathyal gastropods of the Pacific coast of northern Honshu, Japan, chiefly collected by R/V Wakatakamaru. In: Fujita T, ed. *Deep-sea fauna and pollutants off Pacific coast of northern Japan*, Vol. 39. National Museum of Nature and Science Monographs. Tokyo: National Museum of Nature, 225–383.
- Haszprunar G. 1987.** Anatomy and affinities of cocculinid limpets (Mollusca, Archaeogastropoda). *Zoologica Scripta* **16**: 305–324.
- Hinsinger DD, Debruyne R, Thomas M, Denys GPJ, Mennesson M, Utge J, Dettai A. 2015.** Fishing for barcodes in the Torrent: from COI to complete mitogenomes on NGS platforms. *DNA Barcodes* **3**: 170–186.
- Hilário A, Metaxas A, Gaudron SM, Howell KL, Mercier A, Mestre NC, Ross RE, Thurnherr AM, Young C. 2015.** Estimating dispersal distance in the deep sea: challenges and applications to marine reserves. *Frontiers in Marine Science* **2**: 6.
- Horsáková V, Nekola JC, Horsák M. 2020.** Integrative taxonomic consideration of the Holarctic *Euconulus fulvus* group of land snails (Gastropoda, Stylommatophora). *Systematics and Biodiversity* **18**: 142–160.
- Kano Y, Takano T, Schwabe E, Warén A. 2016.** Phylogenetic position and systematics of the wood-associate limpet genus *Caymanabyssia* and implications for ecological radiation into deep-sea organic substrates by lepetelloid gastropods. *Marine Ecology* **37**: 1116–1130.
- Katoh K, Standley DM. 2013.** MAFFT multiple sequence alignment software version 7: improvements in performance and usability. *Molecular Biology and Evolution* **30**: 772–780.
- Kiel S, Goedert JL. 2006.** A wood-fall association from Late Eocene deep-water sediments of Washington State, USA. *Palaos* **21**: 548–556.
- Kimura M. 1980.** A simple method for estimating evolutionary rates of base substitutions through comparative studies of nucleotide sequences. *Journal of Molecular Evolution* **16**: 111–120.
- Kuroda T, Habe T. 1949.** On the gastropod genus *Cocculina* from Japan. *Venus (Japan Journal of Malacology)* **15**: 58–67.
- Leal JH, Harasewych MG. 1999.** Deepest Atlantic molluscs: hadal limpets (Mollusca, Gastropoda, Cocculiniformia) from the northern boundary of the Caribbean Plate. *Invertebrate Biology* **118**: 116–136.
- Lee H, Chen W-J, Puillandre N, Aznar-Cormano L, Tsai M-H, Samadi S. 2019.** Incorporation of deep-sea and small-sized species provides new insights into gastropods



- phylogeny. *Molecular Phylogenetics and Evolution* **135**: 136–147.
- Lesicki A. 1998.** Checklist of gastropod species referred to the order Cocculiniformia Haszprunar, 1987 (Gastropoda: Cocculinoidea et Lepetelloidea) with some remarks on their food preferences. *Folia Malacologica* **6**: 47–62.
- Lorion J, Buge B, Cruaud C, Samadi S. 2010.** New insights into diversity and evolution of deep-sea Mytilidae (Mollusca: Bivalvia). *Molecular Phylogenetics and Evolution* **57**: 71–83.
- Lorion J, Duperron S, Gros O, Cruaud C, Samadi S. 2009.** Several deep-sea mussels and their associated symbionts are able to live both on wood and on whale falls. *Proceedings of the Royal Society B: Biological Sciences* **276**: 177–185.
- Lorion J, Kiel S, Faure B, Kawato M, Ho SYW, Marshall B, Tsuchida S, Miyazaki J-I, Fujiwara Y. 2013.** Adaptive radiation of chemosymbiotic deep-sea mussels. *Proceedings of the Royal Society B: Biological Sciences* **280**: 20131243.
- Marshall BA. [1985]1986.** Recent and Tertiary Cocculinidae and Pseudococculinidae (Mollusca: Gastropoda) from New Zealand and New South Wales. *New Zealand Journal of Zoology* **12**: 505–546.
- Marshall BA. 1994.** Deep-sea gastropods from the New Zealand region associated with Recent whale bones and an Eocene turtle. *The Nautilus* **108**: 1–8.
- Martens E. 1904.** Die beschalten Gastropoden der deutschen Tiefsee-Expedition 1898–1899. A. Systematisch-geographischer Teil. *Wissenschaftliche Ergebnisse der deutschen Tiefsee-Expedition auf dem Dampfer "Valdivia"* **7**: 1–146.
- McClain CR, Hardy SM. 2010.** The dynamics of biogeographic ranges in the deep sea. *Proceedings of the Royal Society B: Biological Sciences* **277**: 3533–3546.
- McLean JH. 1987.** Taxonomic descriptions of cocculinid limpets (Mollusca, Archaeogastropoda): two new species and three rediscovered species. *Zoologica Scripta* **16**: 325–333.
- McLean JH, Harasewych MG. 1995.** Review of western Atlantic species of cocculinid and pseudococculinid limpets, with descriptions of new species (Gastropoda: Cocculiniformia). *Contributions in Science, Natural History Museum of Los Angeles County* **453**: 1–33.
- Miller MA, Pfeiffer W, Schwartz T. 2010.** Creating the CIPRES Science Gateway for inference of large phylogenetic trees. *Proceedings of the Gateway Computing Environments Workshop (GCE)*, 14 November 2010, New Orleans, LA, 1–8.
- Moskalev LI. 1976.** Concerning the generic diagnostics of the Cocculinidae (Gastropoda, Prosobranchia). *Trudy Instituta Okeanologii Imeni P.P. Shirshov, Akademiya Nauk USSR* **99**: 59–70. [in Russian; English translation by Shkurkin GV. 1978].
- Nantarat N, Sutcharit C, Tongkerd P, Wade CM, Naggs F, Panha S. 2019.** Phylogenetics and species delimitations of the operculated land snail *Cyclophorus volvulus* (Gastropoda: Cyclophoridae) reveal cryptic diversity and new species in Thailand. *Scientific Reports* **9**: 7041.
- Oksanen J, Blanchet FG, Friendly M, Kindt R, Legendre P, McGlenn D, Minchin PR, O'Hara RB, Simpson GL, Solymos P, Stevens MHH, Szoecs E, Wagner H. 2019.** *Vegan: community ecology package. R package version 2.5-6.* Available at: <https://CRAN.R-project.org/package=vegan>
- Pante E, Corbari L, Thubaut J, Chan T-Y, Mana R, Boisselier M-C, Bouchet P, Samadi S. 2012.** Exploration of the deep-sea fauna of Papua New Guinea. *Oceanography* **25**: 214–225.
- Pante E, Puillandre N, Viricel A, Arnaud-Haond S, Aurelle D, Castelin M, Chenuil A, Destombe C, Forcioli D, Valero M, Viard F, Samadi S. 2015.** Species are hypotheses: avoid connectivity assessments based on pillars of sand. *Molecular Ecology* **24**: 525–544.
- Plouviez S, Shank TM, Faure B, Daguin-Thiebaut C, Viard F, Lallier FH, Jollivet D. 2009.** Comparative phylogeography among hydrothermal vent species along the East Pacific Rise reveals vicariant processes and population expansion in the south. *Molecular Ecology* **18**: 3903–3917.
- Plum C, Pradillon F, Fujiwara Y, Sarrazin J. 2017.** Copepod colonization of organic and inorganic substrata at a deep-sea hydrothermal vent site on the Mid-Atlantic Ridge. *Deep Sea Research Part II: Topical Studies in Oceanography* **137**: 335–348.
- Ponder WF, Lindberg DR. 1997.** Towards a phylogeny of gastropod molluscs: an analysis using morphological characters. *Zoological Journal of the Linnean Society* **119**: 83–265.
- Pons J, Barraclough TG, Gomez-Zurita J, Cardoso A, Duran DP, Hazell S, Kamoun S, Sumlin WD, Vogler AP. 2006.** Sequence-based species delimitation for the DNA taxonomy of undescribed insects. *Systematic Biology* **55**: 595–609.
- Puillandre N, Fedosov AE, Zaharias P, Aznar-Cormano L, Kantor YI. 2017.** A quest for the lost types of *Lophiotoma* (Gastropoda: Conoidea: Turridae): integrative taxonomy in a nomenclatural mess. *Zoological Journal of the Linnean Society* **181**: 243–271.
- Puillandre N, Lambert A, Brouillet S, Achaz G. 2012a.** ABGD, automatic barcode gap discovery for primary species delimitation. *Molecular Ecology* **21**: 1864–1877.
- Puillandre N, Modica MV, Zhang Y, Sirovich L, Boisselier M-C, Cruaud C, Holford M, Samadi S. 2012b.** Large-scale species delimitation method for hyperdiverse groups. *Molecular Ecology* **21**: 2671–2691.
- Rambaut A. 1996.** *Se-al: sequence alignment editor version 1.0 a1.* Oxford: University of Oxford.
- Rambaut A, Suchard MA, Xie D, Drummond AJ. 2014.** *Tracer v.1.6.* Available at: <http://beast.bio.ed.ac.uk/Tracer>.
- Razkin O, Gómez-Moliner BJ, Vardinoyannis K, Martínez-Ortí A, Madeira MJ. 2017.** Species delimitation for cryptic species complexes: case study of *Pyramidula* (Gastropoda, Pulmonata). *Zoologica Scripta* **46**: 55–72.
- Ronquist F, Teslenko M, Van der Mark P, Ayres DL, Darling A, Höhna S, Larget B, Liu L, Suchard MA, Huelsenbeck JP. 2012.** MrBayes 3.2: efficient Bayesian phylogenetic inference and model choice across a large model space. *Systematic Biology* **61**: 539–542.
- Saeedi H, Bernardino AF, Shimabukuro M, Falchetto G, Sumida PYG. 2019.** Marcofaunal community structure and biodiversity patterns based on a wood-fall experiment in the deep south-west Atlantic. *Deep Sea Research Part I: Oceanographic Research Papers* **145**: 73–82.

- Samadi S, Corbari L, Lorion J, Hourdez S, Haga T, Dupont J, Boisselier M-C, Richer de Forges B. 2010.** Biodiversity of deep-sea organisms associated with sunken-wood or other organic remains sampled in the tropical Indo-Pacific. *Cahiers de Biologie Marine* **51**: 459–466.
- Samadi S, Quéméré E, Lorion J, Tillier A, von Cosel R, Lopez P, Cruaud C, Couloux A, Boisselier-Dubayle M-C. 2007.** Molecular phylogeny in mytilids supports the wooden steps to deep-sea vents hypothesis. *Comptes Rendus Biologies* **330**: 446–456.
- Schepman MM. 1908.** The Prosobranchia of the Siboga Expedition. Part I: *Rhipidoglossa* and *Docoglossa*. *Siboga Expedition* **49a**: 1–98.
- Soltwedel T, Guilini K, Sauter E, Schewe I, Hasemann C. 2018.** Local effects of large food-falls on nematode diversity at an Arctic deep-sea site: results from an *in situ* experiment at the deep-sea observatory HAUSGARTEN. *Journal of Experimental Marine Biology and Ecology* **502**: 129–141.
- Souza BHM, Passos FD, Shimabukuro M, Sumida PYG. 2021.** An integrative approach distinguishes three new species of Abyssochrysoidea (Mollusca: Caenogastropoda) associated with organic falls of the deep south-west Atlantic. *Zoological Journal of the Linnean Society* **191**: 748–771.
- Stamatakis A. 2014.** RAxML version 8: a tool for phylogenetic analysis and post-analysis of large phylogenies. *Bioinformatics* **30**: 1312–1313.
- Stow DAV, Faugères J-C, Howe JA, Pudsey CJ, Viana AR. 2002.** Bottom currents, contourites and deep-sea sediment drifts: current state-of-the-art. *Geological Society London Memoirs* **22**: 7–20.
- Strong EE, Harasewych MG, Haszprunar G. 2003.** Phylogeny of the Cocculinoidea (Mollusca, Gastropoda). *Invertebrate Biology* **122**: 114–125.
- Stuart CT, Brault S, Rowe GT, Wei C-L, Wagstaff M, McClain CR, Rex MA. 2017.** Nestedness and species replacement along bathymetric gradients in the deep sea reflect productivity: a test with polychaete assemblages in the oligotrophic north-west Gulf of Mexico. *Journal of Biogeography* **44**: 548–555.
- Tang CQ, Humphreys AM, Fontaneto D, Barraclough TG. 2014.** Effects of phylogenetic reconstruction method on the robustness of species delimitation using single-locus data. *Methods in Ecology and Evolution* **5**: 1086–1094.
- Thiele J. 1909.** Cocculinoidea und die Gattungen *Phenacolepas* und *Titiscania*. *Systematisches Conchylien-Cabinet von Martini & Chemnitz* **2** **11a**: 1–48.
- Thiele J. 1925.** Prosobranchia. In: Kükenthal W, Krumbach T, eds. *Handbuch der zoologie*. Berlin: Walter de Gruyter & Co., 40–94.
- Thubaut J, Puillandre N, Faure B, Cruaud C, Samadi S. 2013.** The contrasted evolutionary fates of deep-sea chemosynthetic mussels (Bivalvia, Bathymodiolinae). *Ecology and Evolution* **3**: 4748–4766.
- Turner RD. 1977.** Wood, mollusks, and deep-sea food chains. *American Malacological Union Bulletin* **1977**: 13–19.
- Warén A. 1996.** New and little known Mollusca from Iceland and Scandinavia 3. *Sarsia* **81**: 197–245.
- Warén A. 2011.** Molluscs on biogenic substrates. In: Bouchet P, Le Guyader H, Pascal O, eds. *The natural history of Santo*. Paris: Museum National d'Histoire Naturelle and Pro-Nature international; Marseille: IRD, 438–448.
- Watson RB. 1886.** Report on the Scaphopoda and Gastropoda collected by *H.M.S. Challenger* during the years 1873–1876. Report on the scientific results of the voyage of the *H.M.S. Challenger*, 1873–1876. *Zoology* **15**: 1–680.
- Wolff T. 1979.** Macrofaunal utilization of plant remains in the deep sea. *Sarsia* **64**: 117–143.
- Yahagi T, Fukumori H, Warén A, Kano Y. 2019.** Population connectivity of hydrothermal-vent limpets along the northern Mid-Atlantic Ridge (Gastropoda: Neritimorpha: Phenacolepadidae). *Journal of the Marine Biological Association of the UK* **99**: 179–185.
- Yahagi T, Thaler AD, Van Dover CL, Kano Y. 2020.** Population connectivity of the hydrothermal-vent limpet *Shinkailepas tollmanni* in the southwest Pacific (Gastropoda: Neritimorpha: Phenacolepadidae). *PLoS One* **15**: e0239784.
- Yahagi T, Watanabe HK, Kojima S, Kano Y. 2017.** Do larvae from deep-sea hydrothermal vents disperse in surface waters? *Ecology* **98**: 1524–1534.
- Young CM, Emson RH, Rice ME, Tyler PA. 2013.** A paradoxical mismatch of fecundity and recruitment in deep-sea opportunists: cocculinid and pseudococculinid limpets colonizing vascular plant remains on the Bahamian Slope. *Deep-Sea Research Part I-Topical Studies in Oceanography* **92**: 36–45.
- Young CM, He R, Emler RB, Li Y, Qian H, Arellano SM, Gaest AV, Bennett KC, Wolf M, Smart TI, Rice ME. 2012.** Dispersal of deep-sea larvae from the intra-American seas: simulations of trajectories using ocean models. *Integrative and Comparative Biology* **52**: 483–496.
- Zaharias P, Kantor Y, Fedosov AE, Criscione F, Hallan A, Kano Y, Bardin J, Puillandre N. 2020.** Just the once will not hurt: DNA suggests species lumping over two oceans in deep-sea snails (Cryptogemma). *Zoological Journal of the Linnean Society* **190**: 532–557.
- Zhang JJ, Kapli P, Pavlidis P, Stamatakis A. 2013.** A general species delimitation method with applications to phylogenetic placements. *Bioinformatics* **29**: 2869–2876.
- Zhang K, Sun J, Xu T, Qiu J-W, Qian P-Y. 2021.** Phylogenetic relationships and adaptation in deep-sea mussels: insights from mitochondrial genomes. *International Journal of Molecular Sciences* **22**: 1900.
- Zhang SQ, Zhang SP. 2018.** *Cocculina delphinicola* sp. nov., a new cocculinid species from whale bone in the East China Sea (Gastropoda: Cocculiniformia). *Zootaxa* **4455**: 189–195.

## SUPPORTING INFORMATION

Additional Supporting Information may be found in the online version of this article at the publisher's web-site:

**Table S1.** List of oceanographic expeditions (a), specimens analysed in this study (b) and information available from sequences collected in GenBank (c).

**Table S2.** Morphological conditions of SSHs.

**Figure S1.** Maximum likelihood tree of cocculinids based on the *cox1* dataset. Numbers at nodes represent bootstrap values in percentages. Name of specimens collected during ‘Tropical Deep Sea Benthos’ expeditions are shown as: voucher number, expedition, station, depth; specimens collected around Japan: voucher number, locality or station, depth. See [Supporting Information \(Table S2\)](#) for details.

**Figure S2.** Maximum likelihood tree based on the ‘master’ 28S dataset.

**Figure S3.** 28S subtrees.

**Figure S4.** Maximum likelihood tree based on the combined three-gene dataset (*cox1*, 28S and *H3*).

**Figure S5.** Bayesian tree based on the combined three-gene dataset (*cox1*, 28S and *H3*).
